# Supplementary material for: Screening copper-based single-atom alloy catalysts for electrochemical nitrogen reduction
Source: Royal Society of Chemistry journal article supplement (doi:10.1039/d5cp03528g), 2025-11-14
Supplement: d5cp03528g1.xlsx [file d5cp03528g1.xlsx]

## Sheet: Figure1
Sc	-6.00551
Ti	-5.26678
V	-2.92852
Cr	-5.30004
Mn	-3.37596
Fe	-2.94423
Co	-1.91362
Ni	-3.63021
Cu	-3.87269
Zn	-2.25521
Y	-7.29621
Zr	-7.61319
Nb	-6.86491
Mo	-4.84142
Tc	-5.44272
Ru	-6.56255
Rh	-6.64142
Pd	-5.41163
Ag	-4.22952
Cd	-1.93505
Lu	-6.60436
Hf	-7.58088
Ta	-7.00989
W	-5.45483
Re	-5.02008
Os	-6.19884
Ir	-7.22119
Pt	-7.18817
Au	-5.20116
Hg	-1.45955

## Sheet: Figure 2 c
TM/Cu SAAs	N-N bond length		Charge transfer
Sc	1.118	1.118	0.01066	1.115
Ti	1.118	1.118	0.00691	1.115
V	1.135	1.217	0.31403	1.115
Cr	1.128	1.128	0.18023	1.115
Mn	1.12	1.119	0.09338	1.115
Fe	1.136	1.152	0.32755	1.115
Co	1.134	1.121	0.31493	1.115
Ni	1.14	1.14	0.41012	1.115
Cu	1.126	1.12	0.15771	1.115
Zn	1.119	1.119	0.0625	1.115
Y	1.118	1.118	0.00286	1.115
Zr	1.118	1.118	0.00752	1.115
Nb	1.15	1.236	0.50175	1.115
Mo	1.156	1.234	0.63672	1.115
Tc	1.155	1.197	0.62502	1.115
Ru	1.15	1.175	0.51795	1.115
Rh	1.143	1.156	0.43604	1.115
Pd	1.131	1.131	0.26533	1.115
Ag	1.118	1.119	0.03433	1.115
Cd	1.118	1.119	0.04259	1.115
Lu	1.118	1.118	0.00569	1.115
Hf	1.118	1.118	0.0098	1.115
Ta	1.156	1.229	0.55833	1.115
W	1.159	1.271	0.77093	1.115
Re	1.158	1.224	0.76385	1.115
Os	1.154	1.187	0.63592	1.115
Ir	1.147	1.164	0.50732	1.115
Pt	1.136	1.121	0.36016	1.115
Au	1.119	1.119	0.05682	1.115
Hg	1.119	1.118	0.05588	1.115

## Sheet: Figure2 d
TM/Cu SAAs	Adsorption free energy	Adsorption free energy	Distance of TM-N/H
Sc	0.02111	1.76996	3.995	1.87202
Ti	0.38988	1.25784	4.017	1.77843
V	-1.43606	-0.2262	2.044	1.74978
Cr	-0.21764	0.5827	2.088	1.7217
Mn	-0.05266	0.49824	2.354	1.69919
Fe	-1.0381	-0.30834	1.94	1.61461
Co	-2.378	-1.41802	1.875	1.56174
Ni	-0.85154	-0.10795	1.753	1.46087
Cu	-0.07096	0.01892	2.016	1.903
Zn	-0.0139	0.48302	2.964	1.58926
Y	-0.02803	-0.45511	3.988	2.23785
Zr	0.04527	1.30563	4.315	1.89926
Nb	-0.46357	0.44183	2.067	1.807
Mo	-0.97896	-0.09941	1.963	1.73421
Tc	-1.30794	-0.23101	1.896	1.6649
Ru	-1.36778	-0.41098	1.876	1.61034
Rh	-0.97362	-0.29375	1.893	1.57939
Pd	-0.30163	0.16453	2.025	1.59193
Ag	-0.01864	0.66288	3.002	1.67633
Cd	0.00737	0.65601	3.314	1.75673
Lu	0.0087	-0.02699	4.219	2.2415
Hf	0.05398	1.03848	4.119	1.87681
Ta	-0.63602	0.11644	2.046	1.80022
W	-1.38376	-0.49974	1.965	1.73471
Re	-1.57101	-0.5967	1.917	1.67688
Os	-1.53023	-0.71805	1.886	1.63035
Ir	-1.09293	-0.59988	1.889	1.59983
Pt	-0.30944	-0.27503	1.973	1.58778
Au	-0.00381	0.30926	3.462	1.62682
Hg	-0.08256	0.78204	3.496	1.71557

## Sheet: Figure 3 b
Energy	Co-d		N-2p		Cu-d		N-2p
-25.3312	0	0	0	0	0	0	0	0
-25.3132	0	0	0	0	0	0	0	0
-25.2962	0	0	0	0	0	0	0	0
-25.2792	0	0	0	0	0	0	0	0
-25.2612	0	0	0	0	0	0	0	0
-25.2442	0	0	0	0	0	0	0	0
-25.2262	0	0	0	0	0	0	0	0
-25.2092	0	0	0	0	0	0	0	0
-25.1922	0	0	0	0	0	0	0	0
-25.1742	0	0	0	0	0	0	0	0
-25.1572	0	0	0	0	0	0	0	0
-25.1392	0	0	0	0	0	0	0	0
-25.1222	0	0	0	0	0	0	0	0
-25.1042	0	0	0	0	0	0	0	0
-25.0872	0	0	0	0	0	0	0	0
-25.0702	0	0	0	0	0	0	0	0
-25.0522	0	0	0	0	0	0	0	0
-25.0352	0	0	0	0	0	0	0	0
-25.0172	0	0	0	0	0	0	0	0
-25.0002	0	0	0	0	0	0	0	0
-24.9832	0	0	0	0	0	0	0	0
-24.9652	0	0	0	0	0	0	0	0
-24.9482	0	0	0	0	0	0	0	0
-24.9302	0	0	0	0	0	0	0	0
-24.9132	0	0	0	0	0	0	0	0
-24.8962	0	0	0	0	0	0	0	0
-24.8782	0	0	0	0	0	0	0	0
-24.8612	0	0	0	0	0	0	0	0
-24.8432	0	0	0	0	0	0	0	0
-24.8262	0	0	0	0	0	0	0	0
-24.8092	0	0	0	0	0	0	0	0
-24.7912	0	0	0	0	0	0	0	0
-24.7742	0	0	0	0	0	0	0	0
-24.7562	0	0	0	0	0	0	0	0
-24.7392	0	0	0	0	0	0	0	0
-24.7222	0	0	0	0	0	0	0	0
-24.7042	0	0	0	0	0	0	0	0
-24.6872	0	0	0	0	0	0	0	0
-24.6692	0	0	0	0	0	0	0	0
-24.6522	0	0	0	0	0	0	0	0
-24.6352	0	0	0	0	0	0	0	0
-24.6172	0	0	0	0	0	0	0	0
-24.6002	0	0	0	0	0	0	0	0
-24.5822	0	0	0	0	0	0	0	0
-24.5652	0	0	0	0	0	0	0	0
-24.5482	0	0	0	0	0	0	0	0
-24.5302	0	0	0	0	0	0	0	0
-24.5132	0	0	0	0	0	0	0	0
-24.4952	0	0	0	0	0	0	0	0
-24.4782	0	0	0	0	0	0	0	0
-24.4612	0	0	0	0	0	0	0	0
-24.4432	0	0	0	0	0	0	0	0
-24.4262	0	0	0	0	0	0	0	0
-24.4082	0	0	0	0	0	0	0	0
-24.3912	0	0	0	0	0	0	0	0
-24.3742	0	0	0	0	0	0	0	0
-24.3562	0	0	0	0	0	0	0	0
-24.3392	0	0	0	0	0	0	0	0
-24.3212	0	0	0	0	0	0	0	0
-24.3042	0	0	0	0	0	0	0	0
-24.2872	0	0	0	0	0	0	0	0
-24.2692	0	0	0	0	0	0	0	0
-24.2522	0	0	0	0	0	0	0	0
-24.2342	0	0	0	0	0	0	0	0
-24.2172	0	0	0	0	0	0	0	0
-24.2002	0	0	0	0	0	0	0	0
-24.1822	0	0	0	0	0	0	0	0
-24.1652	0	0	0	0	0	0	0	0
-24.1472	0	0	0	0	0	0	0	0
-24.1302	0	0	0	0	0	0	0	0
-24.1132	0	0	0	0	0	0	0	0
-24.0952	0	0	0	0	0	0	0	0
-24.0782	0	0	0	0	0	0	0	0
-24.0602	0	0	0	0	0	0	0	0
-24.0432	0	0	0	0	0	0	0	0
-24.0262	0	0	0	0	0	0	0	0
-24.0082	0	0	0	0	0	0	0	0
-23.9912	0	0	0	0	0	0	0	0
-23.9732	0	0	0	0	0	0	0	0
-23.9562	0	0	0	0	0	0	0	0
-23.9382	0	0	0	0	0	0	0	0
-23.9212	0	0	0	0	0	0	0	0
-23.9042	0	0	0	0	0	0	0	0
-23.8862	0	0	0	0	0	0	0	0
-23.8692	0	0	0	0	0	0	0	0
-23.8512	0	0	0	0	0	0	0	0
-23.8342	0	0	0	0	0	0	0	0
-23.8172	0	0	0	0	0	0	0	0
-23.7992	0	0	0	0	0	0	0	0
-23.7822	0	0	0	0	0	0	0	0
-23.7642	0	0	0	0	0	0	0	0
-23.7472	0	-0.03896	0	-15.6227	0.01321	-0.01321	15.3791	-15.3791
-23.7302	0	0	0	0	0	0	0	0
-23.7122	0.0558	0	15.6628	0	0	0	0	0
-23.6952	0	0	0	0	0	0	0	0
-23.6772	0	0	0	0	0	0	0	0
-23.6602	0	0	0	0	0	0	0	0
-23.6432	0	0	0	0	0	0	0	0
-23.6252	0	0	0	0	0	0	0	0
-23.6082	0	0	0	0	0	0	0	0
-23.5902	0	0	0	0	0	0	0	0
-23.5732	0	0	0	0	0	0	0	0
-23.5562	0	0	0	0	0	0	0	0
-23.5382	0	0	0	0	0	0	0	0
-23.5212	0	0	0	0	0	0	0	0
-23.5032	0	0	0	0	0	0	0	0
-23.4862	0	0	0	0	0	0	0	0
-23.4692	0	0	0	0	0	0	0	0
-23.4512	0	0	0	0	0	0	0	0
-23.4342	0	0	0	0	0	0	0	0
-23.4162	0	0	0	0	0	0	0	0
-23.3992	0	0	0	0	0	0	0	0
-23.3822	0	0	0	0	0	0	0	0
-23.3642	0	0	0	0	0	0	0	0
-23.3472	0	0	0	0	0	0	0	0
-23.3292	0	0	0	0	0	0	0	0
-23.3122	0	0	0	0	0	0	0	0
-23.2952	0	0	0	0	0	0	0	0
-23.2772	0	0	0	0	0	0	0	0
-23.2602	0	0	0	0	0	0	0	0
-23.2422	0	0	0	0	0	0	0	0
-23.2252	0	0	0	0	0	0	0	0
-23.2082	0	0	0	0	0	0	0	0
-23.1902	0	0	0	0	0	0	0	0
-23.1732	0	0	0	0	0	0	0	0
-23.1552	0	0	0	0	0	0	0	0
-23.1382	0	0	0	0	0	0	0	0
-23.1212	0	0	0	0	0	0	0	0
-23.1032	0	0	0	0	0	0	0	0
-23.0862	0	0	0	0	0	0	0	0
-23.0682	0	0	0	0	0	0	0	0
-23.0512	0	0	0	0	0	0	0	0
-23.0342	0	0	0	0	0	0	0	0
-23.0162	0	0	0	0	0	0	0	0
-22.9992	0	0	0	0	0	0	0	0
-22.9812	0	0	0	0	0	0	0	0
-22.9642	0	0	0	0	0	0	0	0
-22.9472	0	0	0	0	0	0	0	0
-22.9292	0	0	0	0	0	0	0	0
-22.9122	0	0	0	0	0	0	0	0
-22.8942	0	0	0	0	0	0	0	0
-22.8772	0	0	0	0	0	0	0	0
-22.8602	0	0	0	0	0	0	0	0
-22.8422	0	0	0	0	0	0	0	0
-22.8252	0	0	0	0	0	0	0	0
-22.8072	0	0	0	0	0	0	0	0
-22.7902	0	0	0	0	0	0	0	0
-22.7722	0	0	0	0	0	0	0	0
-22.7552	0	0	0	0	0	0	0	0
-22.7382	0	0	0	0	0	0	0	0
-22.7202	0	0	0	0	0	0	0	0
-22.7032	0	0	0	0	0	0	0	0
-22.6852	0	0	0	0	0	0	0	0
-22.6682	0	0	0	0	0	0	0	0
-22.6512	0	0	0	0	0	0	0	0
-22.6332	0	0	0	0	0	0	0	0
-22.6162	0	0	0	0	0	0	0	0
-22.5982	0	0	0	0	0	0	0	0
-22.5812	0	0	0	0	0	0	0	0
-22.5642	0	0	0	0	0	0	0	0
-22.5462	0	0	0	0	0	0	0	0
-22.5292	0	0	0	0	0	0	0	0
-22.5112	0	0	0	0	0	0	0	0
-22.4942	0	0	0	0	0	0	0	0
-22.4772	0	0	0	0	0	0	0	0
-22.4592	0	0	0	0	0	0	0	0
-22.4422	0	0	0	0	0	0	0	0
-22.4242	0	0	0	0	0	0	0	0
-22.4072	0	0	0	0	0	0	0	0
-22.3902	0	0	0	0	0	0	0	0
-22.3722	0	0	0	0	0	0	0	0
-22.3552	0	0	0	0	0	0	0	0
-22.3372	0	0	0	0	0	0	0	0
-22.3202	0	0	0	0	0	0	0	0
-22.3032	0	0	0	0	0	0	0	0
-22.2852	0	0	0	0	0	0	0	0
-22.2682	0	0	0	0	0	0	0	0
-22.2502	0	0	0	0	0	0	0	0
-22.2332	0	0	0	0	0	0	0	0
-22.2162	0	0	0	0	0	0	0	0
-22.1982	0	0	0	0	0	0	0	0
-22.1812	0	0	0	0	0	0	0	0
-22.1632	0	0	0	0	0	0	0	0
-22.1462	0	0	0	0	0	0	0	0
-22.1292	0	0	0	0	0	0	0	0
-22.1112	0	0	0	0	0	0	0	0
-22.0942	0	0	0	0	0	0	0	0
-22.0762	0	0	0	0	0	0	0	0
-22.0592	0	0	0	0	0	0	0	0
-22.0422	0	0	0	0	0	0	0	0
-22.0242	0	0	0	0	0	0	0	0
-22.0072	0	0	0	0	0	0	0	0
-21.9892	0	0	0	0	0	0	0	0
-21.9722	0	0	0	0	0	0	0	0
-21.9552	0	0	0	0	0	0	0	0
-21.9372	0	0	0	0	0	0	0	0
-21.9202	0	0	0	0	0	0	0	0
-21.9022	0	0	0	0	0	0	0	0
-21.8852	0	0	0	0	0	0	0	0
-21.8682	0	0	0	0	0	0	0	0
-21.8502	0	0	0	0	0	0	0	0
-21.8332	0	0	0	0	0	0	0	0
-21.8152	0	0	0	0	0	0	0	0
-21.7982	0	0	0	0	0	0	0	0
-21.7812	0	0	0	0	0	0	0	0
-21.7632	0	0	0	0	0	0	0	0
-21.7462	0	0	0	0	0	0	0	0
-21.7282	0	0	0	0	0	0	0	0
-21.7112	0	0	0	0	0	0	0	0
-21.6942	0	0	0	0	0	0	0	0
-21.6762	0	0	0	0	0	0	0	0
-21.6592	0	0	0	0	0	0	0	0
-21.6412	0	0	0	0	0	0	0	0
-21.6242	0	0	0	0	0	0	0	0
-21.6062	0	0	0	0	0	0	0	0
-21.5892	0	0	0	0	0	0	0	0
-21.5722	0	0	0	0	0	0	0	0
-21.5542	0	0	0	0	0	0	0	0
-21.5372	0	0	0	0	0	0	0	0
-21.5192	0	0	0	0	0	0	0	0
-21.5022	0	0	0	0	0	0	0	0
-21.4852	0	0	0	0	0	0	0	0
-21.4672	0	0	0	0	0	0	0	0
-21.4502	0	0	0	0	0	0	0	0
-21.4322	0	0	0	0	0	0	0	0
-21.4152	0	0	0	0	0	0	0	0
-21.3982	0	0	0	0	0	0	0	0
-21.3802	0	0	0	0	0	0	0	0
-21.3632	0	0	0	0	0	0	0	0
-21.3452	0	0	0	0	0	0	0	0
-21.3282	0	0	0	0	0	0	0	0
-21.3112	0	0	0	0	0	0	0	0
-21.2932	0	0	0	0	0	0	0	0
-21.2762	0	0	0	0	0	0	0	0
-21.2582	0	0	0	0	0	0	0	0
-21.2412	0	0	0	0	0	0	0	0
-21.2242	0	0	0	0	0	0	0	0
-21.2062	0	0	0	0	0	0	0	0
-21.1892	0	0	0	0	0	0	0	0
-21.1712	0	0	0	0	0	0	0	0
-21.1542	0	0	0	0	0	0	0	0
-21.1372	0	0	0	0	0	0	0	0
-21.1192	0	0	0	0	0	0	0	0
-21.1022	0	0	0	0	0	0	0	0
-21.0842	0	0	0	0	0	0	0	0
-21.0672	0	0	0	0	0	0	0	0
-21.0502	0	0	0	0	0	0	0	0
-21.0322	0	0	0	0	0	0	0	0
-21.0152	0	0	0	0	0	0	0	0
-20.9972	0	0	0	0	0	0	0	0
-20.9802	0	0	0	0	0	0	0	0
-20.9632	0	0	0	0	0	0	0	0
-20.9452	0	0	0	0	0	0	0	0
-20.9282	0	0	0	0	0	0	0	0
-20.9102	0	0	0	0	0	0	0	0
-20.8932	0	0	0	0	0	0	0	0
-20.8762	0	0	0	0	0	0	0	0
-20.8582	0	0	0	0	0	0	0	0
-20.8412	0	0	0	0	0	0	0	0
-20.8232	0	0	0	0	0	0	0	0
-20.8062	0	0	0	0	0	0	0	0
-20.7892	0	0	0	0	0	0	0	0
-20.7712	0	0	0	0	0	0	0	0
-20.7542	0	0	0	0	0	0	0	0
-20.7362	0	0	0	0	0	0	0	0
-20.7192	0	0	0	0	0	0	0	0
-20.7022	0	0	0	0	0	0	0	0
-20.6842	0	0	0	0	0	0	0	0
-20.6672	0	0	0	0	0	0	0	0
-20.6492	0	0	0	0	0	0	0	0
-20.6322	0	0	0	0	0	0	0	0
-20.6152	0	0	0	0	0	0	0	0
-20.5972	0	0	0	0	0	0	0	0
-20.5802	0	0	0	0	0	0	0	0
-20.5622	0	0	0	0	0	0	0	0
-20.5452	0	0	0	0	0	0	0	0
-20.5282	0	0	0	0	0	0	0	0
-20.5102	0	0	0	0	0	0	0	0
-20.4932	0	0	0	0	0	0	0	0
-20.4752	0	0	0	0	0	0	0	0
-20.4582	0	0	0	0	0	0	0	0
-20.4402	0	0	0	0	0	0	0	0
-20.4232	0	0	0	0	0	0	0	0
-20.4062	0	0	0	0	0	0	0	0
-20.3882	0	0	0	0	0	0	0	0
-20.3712	0	0	0	0	0	0	0	0
-20.3532	0	0	0	0	0	0	0	0
-20.3362	0	0	0	0	0	0	0	0
-20.3192	0	0	0	0	0	0	0	0
-20.3012	0	0	0	0	0	0	0	0
-20.2842	0	0	0	0	0	0	0	0
-20.2662	0	0	0	0	0	0	0	0
-20.2492	0	0	0	0	0	0	0	0
-20.2322	0	0	0	0	0	0	0	0
-20.2142	0	0	0	0	0	0	0	0
-20.1972	0	0	0	0	0	0	0	0
-20.1792	0	0	0	0	0	0	0	0
-20.1622	0	0	0	0	0	0	0	0
-20.1452	0	0	0	0	0	0	0	0
-20.1272	0	0	0	0	0	0	0	0
-20.1102	0	0	0	0	0	0	0	0
-20.0922	0	0	0	0	0	0	0	0
-20.0752	0	0	0	0	0	0	0	0
-20.0582	0	0	0	0	0	0	0	0
-20.0402	0	0	0	0	0	0	0	0
-20.0232	0	0	0	0	0	0	0	0
-20.0052	0	0	0	0	0	0	0	0
-19.9882	0	0	0	0	0	0	0	0
-19.9712	0	0	0	0	0	0	0	0
-19.9532	0	0	0	0	0	0	0	0
-19.9362	0	0	0	0	0	0	0	0
-19.9182	0	0	0	0	0	0	0	0
-19.9012	0	0	0	0	0	0	0	0
-19.8842	0	0	0	0	0	0	0	0
-19.8662	0	0	0	0	0	0	0	0
-19.8492	0	0	0	0	0	0	0	0
-19.8312	0	0	0	0	0	0	0	0
-19.8142	0	0	0	0	0	0	0	0
-19.7972	0	0	0	0	0	0	0	0
-19.7792	0	0	0	0	0	0	0	0
-19.7622	0	0	0	0	0	0	0	0
-19.7442	0	0	0	0	0	0	0	0
-19.7272	0	0	0	0	0	0	0	0
-19.7102	0	0	0	0	0	0	0	0
-19.6922	0	0	0	0	0	0	0	0
-19.6752	0	0	0	0	0	0	0	0
-19.6572	0	0	0	0	0	0	0	0
-19.6402	0	0	0	0	0	0	0	0
-19.6232	0	0	0	0	0	0	0	0
-19.6052	0	0	0	0	0	0	0	0
-19.5882	0	0	0	0	0	0	0	0
-19.5702	0	0	0	0	0	0	0	0
-19.5532	0	0	0	0	0	0	0	0
-19.5362	0	0	0	0	0	0	0	0
-19.5182	0	0	0	0	0	0	0	0
-19.5012	0	0	0	0	0	0	0	0
-19.4832	0	0	0	0	0	0	0	0
-19.4662	0	0	0	0	0	0	0	0
-19.4492	0	0	0	0	0	0	0	0
-19.4312	0	0	0	0	0	0	0	0
-19.4142	0	0	0	0	0	0	0	0
-19.3962	0	0	0	0	0	0	0	0
-19.3792	0	0	0	0	0	0	0	0
-19.3622	0	0	0	0	0	0	0	0
-19.3442	0	0	0	0	0	0	0	0
-19.3272	0	0	0	0	0	0	0	0
-19.3092	0	0	0	0	0	0	0	0
-19.2922	0	0	0	0	0	0	0	0
-19.2742	0	0	0	0	0	0	0	0
-19.2572	0	0	0	0	0	0	0	0
-19.2402	0	0	0	0	0	0	0	0
-19.2222	0	0	0	0	0	0	0	0
-19.2052	0	0	0	0	0	0	0	0
-19.1872	0	0	0	0	0	0	0	0
-19.1702	0	0	0	0	0	0	0	0
-19.1532	0	0	0	0	0	0	0	0
-19.1352	0	0	0	0	0	0	0	0
-19.1182	0	0	0	0	0	0	0	0
-19.1002	0	0	0	0	0	0	0	0
-19.0832	0	0	0	0	0	0	0	0
-19.0662	0	0	0	0	0	0	0	0
-19.0482	0	0	0	0	0	0	0	0
-19.0312	0	0	0	0	0	0	0	0
-19.0132	0	0	0	0	0	0	0	0
-18.9962	0	0	0	0	0	0	0	0
-18.9792	0	0	0	0	0	0	0	0
-18.9612	0	0	0	0	0	0	0	0
-18.9442	0	0	0	0	0	0	0	0
-18.9262	0	0	0	0	0	0	0	0
-18.9092	0	0	0	0	0	0	0	0
-18.8922	0	0	0	0	0	0	0	0
-18.8742	0	0	0	0	0	0	0	0
-18.8572	0	0	0	0	0	0	0	0
-18.8392	0	0	0	0	0	0	0	0
-18.8222	0	0	0	0	0	0	0	0
-18.8052	0	0	0	0	0	0	0	0
-18.7872	0	0	0	0	0	0	0	0
-18.7702	0	0	0	0	0	0	0	0
-18.7522	0	0	0	0	0	0	0	0
-18.7352	0	0	0	0	0	0	0	0
-18.7182	0	0	0	0	0	0	0	0
-18.7002	0	0	0	0	0	0	0	0
-18.6832	0	0	0	0	0	0	0	0
-18.6652	0	0	0	0	0	0	0	0
-18.6482	0	0	0	0	0	0	0	0
-18.6312	0	0	0	0	0	0	0	0
-18.6132	0	0	0	0	0	0	0	0
-18.5962	0	0	0	0	0	0	0	0
-18.5782	0	0	0	0	0	0	0	0
-18.5612	0	0	0	0	0	0	0	0
-18.5442	0	0	0	0	0	0	0	0
-18.5262	0	0	0	0	0	0	0	0
-18.5092	0	0	0	0	0	0	0	0
-18.4912	0	0	0	0	0	0	0	0
-18.4742	0	0	0	0	0	0	0	0
-18.4572	0	0	0	0	0	0	0	0
-18.4392	0	0	0	0	0	0	0	0
-18.4222	0	0	0	0	0	0	0	0
-18.4042	0	0	0	0	0	0	0	0
-18.3872	0	0	0	0	0	0	0	0
-18.3702	0	0	0	0	0	0	0	0
-18.3522	0	0	0	0	0	0	0	0
-18.3352	0	0	0	0	0	0	0	0
-18.3172	0	0	0	0	0	0	0	0
-18.3002	0	0	0	0	0	0	0	0
-18.2832	0	0	0	0	0	0	0	0
-18.2652	0	0	0	0	0	0	0	0
-18.2482	0	0	0	0	0	0	0	0
-18.2302	0	0	0	0	0	0	0	0
-18.2132	0	0	0	0	0	0	0	0
-18.1952	0	0	0	0	0	0	0	0
-18.1782	0	0	0	0	0	0	0	0
-18.1612	0	0	0	0	0	0	0	0
-18.1432	0	0	0	0	0	0	0	0
-18.1262	0	0	0	0	0	0	0	0
-18.1082	0	0	0	0	0	0	0	0
-18.0912	0	0	0	0	0	0	0	0
-18.0742	0	0	0	0	0	0	0	0
-18.0562	0	0	0	0	0	0	0	0
-18.0392	0	0	0	0	0	0	0	0
-18.0212	0	0	0	0	0	0	0	0
-18.0042	0	0	0	0	0	0	0	0
-17.9872	0	0	0	0	0	0	0	0
-17.9692	0	0	0	0	0	0	0	0
-17.9522	0	0	0	0	0	0	0	0
-17.9342	0	0	0	0	0	0	0	0
-17.9172	0	0	0	0	0	0	0	0
-17.9002	0	0	0	0	0	0	0	0
-17.8822	0	0	0	0	0	0	0	0
-17.8652	0	0	0	0	0	0	0	0
-17.8472	0	0	0	0	0	0	0	0
-17.8302	0	0	0	0	0	0	0	0
-17.8132	0	0	0	0	0	0	0	0
-17.7952	0	0	0	0	0	0	0	0
-17.7782	0	0	0	0	0	0	0	0
-17.7602	0	0	0	0	0	0	0	0
-17.7432	0	0	0	0	0	0	0	0
-17.7262	0	0	0	0	0	0	0	0
-17.7082	0	0	0	0	0	0	0	0
-17.6912	0	0	0	0	0	0	0	0
-17.6732	0	0	0	0	0	0	0	0
-17.6562	0	0	0	0	0	0	0	0
-17.6392	0	0	0	0	0	0	0	0
-17.6212	0	0	0	0	0	0	0	0
-17.6042	0	0	0	0	0	0	0	0
-17.5862	0	0	0	0	0	0	0	0
-17.5692	0	0	0	0	0	0	0	0
-17.5522	0	0	0	0	0	0	0	0
-17.5342	0	0	0	0	0	0	0	0
-17.5172	0	0	0	0	0	0	0	0
-17.4992	0	0	0	0	0	0	0	0
-17.4822	0	0	0	0	0	0	0	0
-17.4652	0	0	0	0	0	0	0	0
-17.4472	0	0	0	0	0	0	0	0
-17.4302	0	0	0	0	0	0	0	0
-17.4122	0	0	0	0	0	0	0	0
-17.3952	0	0	0	0	0	0	0	0
-17.3782	0	0	0	0	0	0	0	0
-17.3602	0	0	0	0	0	0	0	0
-17.3432	0	0	0	0	0	0	0	0
-17.3252	0	0	0	0	0	0	0	0
-17.3082	0	0	0	0	0	0	0	0
-17.2912	0	0	0	0	0	0	0	0
-17.2732	0	0	0	0	0	0	0	0
-17.2562	0	0	0	0	0	0	0	0
-17.2382	0	0	0	0	0	0	0	0
-17.2212	0	0	0	0	0	0	0	0
-17.2042	0	0	0	0	0	0	0	0
-17.1862	0	0	0	0	0	0	0	0
-17.1692	0	0	0	0	0	0	0	0
-17.1512	0	0	0	0	0	0	0	0
-17.1342	0	0	0	0	0	0	0	0
-17.1172	0	0	0	0	0	0	0	0
-17.0992	0	0	0	0	0	0	0	0
-17.0822	0	0	0	0	0	0	0	0
-17.0642	0	0	0	0	0	0	0	0
-17.0472	0	0	0	0	0	0	0	0
-17.0292	0	0	0	0	0	0	0	0
-17.0122	0	0	0	0	0	0	0	0
-16.9952	0	0	0	0	0	0	0	0
-16.9772	0	0	0	0	0	0	0	0
-16.9602	0	0	0	0	0	0	0	0
-16.9422	0	0	0	0	0	0	0	0
-16.9252	0	0	0	0	0	0	0	0
-16.9082	0	0	0	0	0	0	0	0
-16.8902	0	0	0	0	0	0	0	0
-16.8732	0	0	0	0	0	0	0	0
-16.8552	0	0	0	0	0	0	0	0
-16.8382	0	0	0	0	0	0	0	0
-16.8212	0	0	0	0	0	0	0	0
-16.8032	0	0	0	0	0	0	0	0
-16.7862	0	0	0	0	0	0	0	0
-16.7682	0	0	0	0	0	0	0	0
-16.7512	0	0	0	0	0	0	0	0
-16.7342	0	0	0	0	0	0	0	0
-16.7162	0	0	0	0	0	0	0	0
-16.6992	0	0	0	0	0	0	0	0
-16.6812	0	0	0	0	0	0	0	0
-16.6642	0	0	0	0	0	0	0	0
-16.6472	0	0	0	0	0	0	0	0
-16.6292	0	0	0	0	0	0	0	0
-16.6122	0	0	0	0	0	0	0	0
-16.5942	0	0	0	0	0	0	0	0
-16.5772	0	0	0	0	0	0	0	0
-16.5602	0	0	0	0	0	0	0	0
-16.5422	0	0	0	0	0	0	0	0
-16.5252	0	0	0	0	0	0	0	0
-16.5072	0	0	0	0	0	0	0	0
-16.4902	0	0	0	0	0	0	0	0
-16.4732	0	0	0	0	0	0	0	0
-16.4552	0	0	0	0	0	0	0	0
-16.4382	0	0	0	0	0	0	0	0
-16.4202	0	0	0	0	0	0	0	0
-16.4032	0	0	0	0	0	0	0	0
-16.3862	0	0	0	0	0	0	0	0
-16.3682	0	0	0	0	0	0	0	0
-16.3512	0	0	0	0	0	0	0	0
-16.3332	0	0	0	0	0	0	0	0
-16.3162	0	0	0	0	0	0	0	0
-16.2992	0	0	0	0	0	0	0	0
-16.2812	0	0	0	0	0	0	0	0
-16.2642	0	0	0	0	0	0	0	0
-16.2462	0	0	0	0	0	0	0	0
-16.2292	0	0	0	0	0	0	0	0
-16.2122	0	0	0	0	0	0	0	0
-16.1942	0	0	0	0	0	0	0	0
-16.1772	0	0	0	0	0	0	0	0
-16.1592	0	0	0	0	0	0	0	0
-16.1422	0	0	0	0	0	0	0	0
-16.1252	0	0	0	0	0	0	0	0
-16.1072	0	0	0	0	0	0	0	0
-16.0902	0	0	0	0	0	0	0	0
-16.0722	0	0	0	0	0	0	0	0
-16.0552	0	0	0	0	0	0	0	0
-16.0382	0	0	0	0	0	0	0	0
-16.0202	0	0	0	0	0	0	0	0
-16.0032	0	0	0	0	0	0	0	0
-15.9852	0	0	0	0	0	0	0	0
-15.9682	0	0	0	0	0	0	0	0
-15.9512	0	0	0	0	0	0	0	0
-15.9332	0	0	0	0	0	0	0	0
-15.9162	0	0	0	0	0	0	0	0
-15.8982	0	0	0	0	0	0	0	0
-15.8812	0	0	0	0	0	0	0	0
-15.8632	0	0	0	0	0	0	0	0
-15.8462	0	0	0	0	0	0	0	0
-15.8292	0	0	0	0	0	0	0	0
-15.8112	0	0	0	0	0	0	0	0
-15.7942	0	0	0	0	0	0	0	0
-15.7762	0	0	0	0	0	0	0	0
-15.7592	0	0	0	0	0	0	0	0
-15.7422	0	0	0	0	0	0	0	0
-15.7242	0	0	0	0	0	0	0	0
-15.7072	0	0	0	0	0	0	0	0
-15.6892	0	0	0	0	0	0	0	0
-15.6722	0	0	0	0	0	0	0	0
-15.6552	0	0	0	0	0	0	0	0
-15.6372	0	0	0	0	0	0	0	0
-15.6202	0	0	0	0	0	0	0	0
-15.6022	0	0	0	0	0	0	0	0
-15.5852	0	0	0	0	0	0	0	0
-15.5682	0	0	0	0	0	0	0	0
-15.5502	0	0	0	0	0	0	0	0
-15.5332	0	0	0	0	0	0	0	0
-15.5152	0	0	0	0	0	0	0	0
-15.4982	0	0	0	0	0	0	0	0
-15.4812	0	0	0	0	0	0	0	0
-15.4632	0	0	0	0	0	0	0	0
-15.4462	0	0	0	0	0	0	0	0
-15.4282	0	0	0	0	0	0	0	0
-15.4112	0	0	0	0	0	0	0	0
-15.3942	0	0	0	0	0	0	0	0
-15.3762	0	0	0	0	0	0	0	0
-15.3592	0	0	0	0	0	0	0	0
-15.3412	0	0	0	0	0	0	0	0
-15.3242	0	0	0	0	0	0	0	0
-15.3072	0	0	0	0	0	0	0	0
-15.2892	0	0	0	0	0	0	0	0
-15.2722	0	0	0	0	0	0	0	0
-15.2542	0	0	0	0	0	0	0	0
-15.2372	0	0	0	0	0	0	0	0
-15.2202	0	0	0	0	0	0	0	0
-15.2022	0	0	0	0	0	0	0	0
-15.1852	0	0	0	0	0	0	0	0
-15.1672	0	0	0	0	0	0	0	0
-15.1502	0	0	0	0	0	0	0	0
-15.1332	0	0	0	0	0	0	0	0
-15.1152	0	0	0	0	0	0	0	0
-15.0982	0	0	0	0	0	0	0	0
-15.0802	0	0	0	0	0	0	0	0
-15.0632	0	0	0	0	0	0	0	0
-15.0462	0	0	0	0	0	0	0	0
-15.0282	0	0	0	0	0	0	0	0
-15.0112	0	0	0	0	0	0	0	0
-14.9932	0	0	0	0	0	0	0	0
-14.9762	0	0	0	0	0	0	0	0
-14.9592	0	0	0	0	0	0	0	0
-14.9412	0	0	0	0	0	0	0	0
-14.9242	0	0	0	0	0	0	0	0
-14.9062	0	0	0	0	0	0	0	0
-14.8892	0	0	0	0	0	0	0	0
-14.8722	0	0	0	0	0	0	0	0
-14.8542	0	0	0	0	0	0	0	0
-14.8372	0	0	0	0	0	0	0	0
-14.8192	0	0	0	0	0	0	0	0
-14.8022	0	0	0	0	0	0	0	0
-14.7852	0	0	0	0	0	0	0	0
-14.7672	0	0	0	0	0	0	0	0
-14.7502	0	0	0	0	0	0	0	0
-14.7322	0	0	0	0	0	0	0	0
-14.7152	0	0	0	0	0	0	0	0
-14.6972	0	0	0	0	0	0	0	0
-14.6802	0	0	0	0	0	0	0	0
-14.6632	0	0	0	0	0	0	0	0
-14.6452	0	0	0	0	0	0	0	0
-14.6282	0	0	0	0	0	0	0	0
-14.6102	0	0	0	0	0	0	0	0
-14.5932	0	0	0	0	0	0	0	0
-14.5762	0	0	0	0	0	0	0	0
-14.5582	0	0	0	0	0	0	0	0
-14.5412	0	0	0	0	0	0	0	0
-14.5232	0	0	0	0	0	0	0	0
-14.5062	0	0	0	0	0	0	0	0
-14.4892	0	0	0	0	0	0	0	0
-14.4712	0	0	0	0	0	0	0	0
-14.4542	0	0	0	0	0	0	0	0
-14.4362	0	0	0	0	0	0	0	0
-14.4192	0	0	0	0	0	0	0	0
-14.4022	0	0	0	0	0	0	0	0
-14.3842	0	0	0	0	0	0	0	0
-14.3672	0	0	0	0	0	0	0	0
-14.3492	0	0	0	0	0	0	0	0
-14.3322	0	0	0	0	0	0	0	0
-14.3152	0	0	0	0	0	0	0	0
-14.2972	0	0	0	0	0	0	0	0
-14.2802	0	0	0	0	0	0	0	0
-14.2622	0	0	0	0	0	0	0	0
-14.2452	0	0	0	0	0	0	0	0
-14.2282	0	0	0	0	0	0	0	0
-14.2102	0	0	0	0	0	0	0	0
-14.1932	0	0	0	0	0	0	0	0
-14.1752	0	0	0	0	0	0	0	0
-14.1582	0	0	0	0	0	0	0	0
-14.1412	0	0	0	0	0	0	0	0
-14.1232	0	0	0	0	0	0	0	0
-14.1062	0	0	0	0	0	0	0	0
-14.0882	0	0	0	0	0	0	0	0
-14.0712	0	0	0	0	0	0	0	0
-14.0542	0	0	0	0	0	0	0	0
-14.0362	0	0	0	0	0	0	0	0
-14.0192	0	0	0	0	0	0	0	0
-14.0012	0	0	0	0	0	0	0	0
-13.9842	0	0	0	0	0	0	0	0
-13.9672	0	0	0	0	0	0	0	0
-13.9492	0	0	0	0	0	0	0	0
-13.9322	0	0	0	0	0	0	0	0
-13.9142	0	0	0	0	0	0	0	0
-13.8972	0	0	0	0	0	0	0	0
-13.8802	0	0	0	0	0	0	0	0
-13.8622	0	0	0	0	0	0	0	0
-13.8452	0	0	0	0	0	0	0	0
-13.8272	0	0	0	0	0	0	0	0
-13.8102	0	0	0	0	0	0	0	0
-13.7932	0	0	0	0	0	0	0	0
-13.7752	0	0	0	0	0	0	0	0
-13.7582	0	0	0	0	0	0	0	0
-13.7402	0	0	0	0	0	0	0	0
-13.7232	0	0	0	0	0	0	0	0
-13.7062	0	0	0	0	0	0	0	0
-13.6882	0	0	0	0	0	0	0	0
-13.6712	0	0	0	0	0	0	0	0
-13.6532	0	0	0	0	0	0	0	0
-13.6362	0	0	0	0	0	0	0	0
-13.6192	0	0	0	0	0	0	0	0
-13.6012	0	0	0	0	0	0	0	0
-13.5842	0	0	0	0	0	0	0	0
-13.5662	0	0	0	0	0	0	0	0
-13.5492	0	0	0	0	0	0	0	0
-13.5312	0	0	0	0	0	0	0	0
-13.5142	0	0	0	0	0	0	0	0
-13.4972	0	0	0	0	0	0	0	0
-13.4792	0	0	0	0	0	0	0	0
-13.4622	0	0	0	0	0	0	0	0
-13.4442	0	0	0	0	0	0	0	0
-13.4272	0	0	0	0	0	0	0	0
-13.4102	0	0	0	0	0	0	0	0
-13.3922	0	0	0	0	0	0	0	0
-13.3752	0	0	0	0	0	0	0	0
-13.3572	0	0	0	0	0	0	0	0
-13.3402	0	0	0	0	0	0	0	0
-13.3232	0	0	0	0	0	0	0	0
-13.3052	0	0	0	0	0	0	0	0
-13.2882	0	0	0	0	0	0	0	0
-13.2702	0	0	0	0	0	0	0	0
-13.2532	0	0	0	0	0	0	0	0
-13.2362	0	0	0	0	0	0	0	0
-13.2182	0	0	0	0	0	0	0	0
-13.2012	0	0	0	0	0	0	0	0
-13.1832	0	0	0	0	0	0	0	0
-13.1662	0	0	0	0	0	0	0	0
-13.1492	0	0	0	0	0	0	0	0
-13.1312	0	0	0	0	0	0	0	0
-13.1142	0	0	0	0	0	0	0	0
-13.0962	0	0	0	0	0	0	0	0
-13.0792	0	0	0	0	0	0	0	0
-13.0622	0	0	0	0	0	0	0	0
-13.0442	0	0	0	0	0	0	0	0
-13.0272	0	0	0	0	0	0	0	0
-13.0092	0	0	0	0	0	0	0	0
-12.9922	0	0	0	0	0	0	0	0
-12.9752	0	0	0	0	0	0	0	0
-12.9572	0	0	0	0	0	0	0	0
-12.9402	0	0	0	0	0	0	0	0
-12.9222	0	0	0	0	0	0	0	0
-12.9052	0	0	0	0	0	0	0	0
-12.8882	0	0	0	0	0	0	0	0
-12.8702	0	0	0	0	0	0	0	0
-12.8532	0	0	0	0	0	0	0	0
-12.8352	0	0	0	0	0	0	0	0
-12.8182	0	0	0	0	0	0	0	0
-12.8012	0	0	0	0	0	0	0	0
-12.7832	0	0	0	0	0	0	0	0
-12.7662	0	0	0	0	0	0	0	0
-12.7482	0	0	0	0	0	0	0	0
-12.7312	0	0	0	0	0	0	0	0
-12.7142	0	0	0	0	0	0	0	0
-12.6962	0	0	0	0	0	0	0	0
-12.6792	0	0	0	0	0	0	0	0
-12.6612	0	0	0	0	0	0	0	0
-12.6442	0	0	0	0	0	0	0	0
-12.6272	0	0	0	0	0	0	0	0
-12.6092	0	0	0	0	0	0	0	0
-12.5922	0	0	0	0	0	0	0	0
-12.5742	0	0	0	0	0	0	0	0
-12.5572	0	0	0	0	0	0	0	0
-12.5402	0	0	0	0	0	0	0	0
-12.5222	0	0	0	0	0	0	0	0
-12.5052	0	0	0	0	0	0	0	0
-12.4872	0	0	0	0	0	0	0	0
-12.4702	0	0	0	0	0	0	0	0
-12.4532	0	0	0	0	0	0	0	0
-12.4352	0	0	0	0	0	0	0	0
-12.4182	0	0	0	0	0	0	0	0
-12.4002	0	0	0	0	0	0	0	0
-12.3832	0	0	0	0	0	0	0	0
-12.3652	0	0	0	0	0	0	0	0
-12.3482	0	0	0	0	0	0	0	0
-12.3312	0	0	0	0	0	0	0	0
-12.3132	0	0	0	0	0	0	0	0
-12.2962	0	0	0	0	0	0	0	0
-12.2782	0	0	0	0	0	0	0	0
-12.2612	0	0	0	0	0	0	0	0
-12.2442	0	0	0	0	0	0	0	0
-12.2262	0	0	0	0	0	0	0	0
-12.2092	0	0	0	0	0	0	0	0
-12.1912	0	0	0	0	0	0	0	0
-12.1742	0	0	0	0	0	0	0	0
-12.1572	0	0	0	0	0	0	0	0
-12.1392	0	0	0	0	0	0	0	0
-12.1222	0	0	0	0	0	0	0	0
-12.1042	0	0	0	0	0	0	0	0
-12.0872	0	0	0	0	0	0	0	0
-12.0702	0	0	0	0	0	0	0	0
-12.0522	0	0	0	0	0	0	0	0
-12.0352	0	0	0	0	0	0	0	0
-12.0172	0	0	0	0	0	0	0	0
-12.0002	0	0	0	0	0	0	0	0
-11.9832	0	0	0	0	0	0	0	0
-11.9652	0	0	0	0	0	0	0	0
-11.9482	0	0	0	0	0	0	0	0
-11.9302	0	0	0	0	0	0	0	0
-11.9132	0	0	0	0	0	0	0	0
-11.8962	0	0	0	0	0	0	0	0
-11.8782	0	0	0	0	0	0	0	0
-11.8612	0	0	0	0	0	0	0	0
-11.8432	0	0	0	0	0	0	0	0
-11.8262	0	0	0	0	0	0	0	0
-11.8092	0	0	0	0	0	0	0	0
-11.7912	0	0	0	0	0	0	0	0
-11.7742	0	0	0	0	0	0	0	0
-11.7562	0	0	0	0	0	0	0	0
-11.7392	0	0	0	0	0	0	0	0
-11.7222	0	0	0	0	0	0	0	0
-11.7042	0	0	0	0	0	0	0	0
-11.6872	0	0	0	0	0	0	0	0
-11.6692	0	0	0	0	0	0	0	0
-11.6522	0	0	0	0	0	0	0	0
-11.6352	0	0	0	0	0	0	0	0
-11.6172	0	0	0	0	0	0	0	0
-11.6002	0	0	0	0	0	0	0	0
-11.5822	0	0	0	0	0	0	0	0
-11.5652	0	0	0	0	0	0	0	0
-11.5482	0	0	0	0	0	0	0	0
-11.5302	0	0	0	0	0	0	0	0
-11.5132	0	0	0	0	0	0	0	0
-11.4952	0	0	0	0	0	0	0	0
-11.4782	0	0	0	0	0	0	0	0
-11.4612	0	0	0	0	0	0	0	0
-11.4432	0	0	0	0	0	0	0	0
-11.4262	0	0	0	0	0	0	0	0
-11.4082	0	0	0	0	0	0	0	0
-11.3912	0	0	0	0	0	0	0	0
-11.3742	0	0	0	0	0	0	0	0
-11.3562	0	0	0	0	0	0	0	0
-11.3392	0	0	0	0	0	0	0	0
-11.3212	0	0	0	0	0	0	0	0
-11.3042	0	0	0	0	0	0	0	0
-11.2872	0	0	0	0	0	0	0	0
-11.2692	0	0	0	0	0	0	0	0
-11.2522	0	0	0	0	0	0	0	0
-11.2342	0	0	0	0	0	0	0	0
-11.2172	0	0	0	0	0	0	0	0
-11.1992	0	0	0	0	0	0	0	0
-11.1822	0	0	0	0	0	0	0	0
-11.1652	0	0	0	0	0	0	0	0
-11.1472	0	0	0	0	0	0	0	0
-11.1302	0	0	0	0	0	0	0	0
-11.1122	0	0	0	0	0	0	0	0
-11.0952	0	0	0	0	0	0	0	0
-11.0782	0	0	0	0	0	0	0	0
-11.0602	0	0	0	0	1.53809	-1.53809	10.0403	-10.0403
-11.0432	0	0	0	0	0	0	0	0
-11.0252	0	0	0	0	0	0	0	0
-11.0082	0	0	0	0	0	0	0	0
-10.9912	4.37234	0	11.7493	0	0	0	0	0
-10.9732	0	0	0	0	0	0	0	0
-10.9562	0	0	0	0	0	0	0	0
-10.9382	0	0	0	0	0	0	0	0
-10.9212	0	0	0	0	0	0	0	0
-10.9042	0	0	0	0	0	0	0	0
-10.8862	0	0	0	0	0	0	0	0
-10.8692	0	0	0	0	0	0	0	0
-10.8512	0	-1.88868	0	-11.3052	0	0	0	0
-10.8342	0	0	0	0	0	0	0	0
-10.8172	0	0	0	0	0	0	0	0
-10.7992	0	0	0	0	0	0	0	0
-10.7822	0	0	0	0	0	0	0	0
-10.7642	0	0	0	0	0	0	0	0
-10.7472	0	0	0	0	0	0	0	0
-10.7302	0	0	0	0	0	0	0	0
-10.7122	0	0	0	0	0	0	0	0
-10.6952	0	0	0	0	0	0	0	0
-10.6772	0	0	0	0	0	0	0	0
-10.6602	0	0	0	0	0	0	0	0
-10.6432	0	0	0	0	0	0	0	0
-10.6252	0	0	0	0	0	0	0	0
-10.6082	0	0	0	0	0	0	0	0
-10.5902	0	0	0	0	0	0	0	0
-10.5732	0	0	0	0	0	0	0	0
-10.5562	0	0	0	0	0	0	0	0
-10.5382	0	0	0	0	0	0	0	0
-10.5212	0	0	0	0	0	0	0	0
-10.5032	0	0	0	0	0	0	0	0
-10.4862	0	0	0	0	0	0	0	0
-10.4692	0	0	0	0	0	0	0	0
-10.4512	0	0	0	0	0	0	0	0
-10.4342	0	0	0	0	0	0	0	0
-10.4162	0	0	0	0	0	0	0	0
-10.3992	0	0	0	0	0	0	0	0
-10.3822	0	0	0	0	0	0	0	0
-10.3642	0	0	0	0	0	0	0	0
-10.3472	0	0	0	0	0	0	0	0
-10.3292	0	0	0	0	0	0	0	0
-10.3122	0	0	0	0	0	0	0	0
-10.2952	0	0	0	0	0	0	0	0
-10.2772	0	0	0	0	0	0	0	0
-10.2602	0	0	0	0	0	0	0	0
-10.2422	0	0	0	0	0	0	0	0
-10.2252	0	0	0	0	0	0	0	0
-10.2082	0	0	0	0	0	0	0	0
-10.1902	0	0	0	0	0	0	0	0
-10.1732	0	0	0	0	0	0	0	0
-10.1552	0	0	0	0	0	0	0	0
-10.1382	0	0	0	0	0	0	0	0
-10.1212	0	0	0	0	0	0	0	0
-10.1032	0	0	0	0	0	0	0	0
-10.0862	0	0	0	0	0	0	0	0
-10.0682	0	0	0	0	0	0	0	0
-10.0512	0	0	0	0	0	0	0	0
-10.0332	0	0	0	0	0	0	0	0
-10.0162	0	0	0	0	0	0	0	0
-9.99922	0	0	0	0	0	0	0	0
-9.98122	0	0	0	0	0	0	0	0
-9.96422	0	0	0	0	0	0	0	0
-9.94622	0	0	0	0	0	0	0	0
-9.92922	0	0	0	0	0	0	0	0
-9.91222	0	0	0	0	0	0	0	0
-9.89422	0	0	0	0	0	0	0	0
-9.87722	0	0	0	0	0	0	0	0
-9.85922	0	0	0	0	0	0	0	0
-9.84222	0	0	0	0	0	0	0	0
-9.82522	0	0	0	0	0	0	0	0
-9.80722	0	0	0	0	0	0	0	0
-9.79022	0	0	0	0	0	0	0	0
-9.77222	0	0	0	0	0	0	0	0
-9.75522	0	0	0	0	0	0	0	0
-9.73822	0	0	0	0	0	0	0	0
-9.72022	0	0	0	0	0	0	0	0
-9.70322	0	0	0	0	0	0	0	0
-9.68522	0	0	0	0	0	0	0	0
-9.66822	0	0	0	0	0	0	0	0
-9.65122	0	0	0	0	0	0	0	0
-9.63322	0	0	0	0	0	0	0	0
-9.61622	0	0	0	0	0	0	0	0
-9.59822	0	0	0	0	0	0	0	0
-9.58122	0	0	0	0	0	0	0	0
-9.56422	0	0	0	0	0	0	0	0
-9.54622	0	0	0	0	0	0	0	0
-9.52922	0	0	0	0	0	0	0	0
-9.51122	0	0	0	0	0	0	0	0
-9.49422	0	0	0	0	0	0	0	0
-9.47722	0	0	0	0	0	0	0	0
-9.45922	0	0	0	0	0	0	0	0
-9.44222	0	0	0	0	0	0	0	0
-9.42422	0	0	0	0	0	0	0	0
-9.40722	0	0	0	0	0	0	0	0
-9.39022	0	0	0	0	0	0	0	0
-9.37222	0	0	0	0	0	0	0	0
-9.35522	0	0	0	0	0	0	0	0
-9.33722	0	0	0	0	0	0	0	0
-9.32022	0	0	0	0	0	0	0	0
-9.30322	0	0	0	0	0	0	0	0
-9.28522	0	0	0	0	0	0	0	0
-9.26822	0	0	0	0	0	0	0	0
-9.25022	0	0	0	0	0	0	0	0
-9.23322	0	0	0	0	0	0	0	0
-9.21622	0	0	0	0	0	0	0	0
-9.19822	0	0	0	0	0	0	0	0
-9.18122	0	0	0	0	0	0	0	0
-9.16322	0	0	0	0	0	0	0	0
-9.14622	0	0	0	0	0	0	0	0
-9.12922	0	0	0	0	0	0	0	0
-9.11122	0	0	0	0	0	0	0	0
-9.09422	0	0	0	0	0	0	0	0
-9.07622	0	0	0	0	0	0	0	0
-9.05922	0	0	0	0	0	0	0	0
-9.04222	0	0	0	0	0	0	0	0
-9.02422	0	0	0	0	0	0	0	0
-9.00722	0	0	0	0	0	0	0	0
-8.98922	0	0	0	0	0	0	0	0
-8.97222	0	0	0	0	0	0	0	0
-8.95522	0	0	0	0	0	0	0	0
-8.93722	0	0	0	0	0	0	0	0
-8.92022	0	0	0	0	0	0	0	0
-8.90222	0	0	0	0	0	0	0	0
-8.88522	0	0	0	0	0	0	0	0
-8.86722	0	0	0	0	0	0	0	0
-8.85022	0	0	0	0	0	0	0	0
-8.83322	0	0	0	0	0	0	0	0
-8.81522	0	0	0	0	0	0	0	0
-8.79822	0	0	0	0	0	0	0	0
-8.78022	0	0	0	0	0	0	0	0
-8.76322	0	0	0	0	0	0	0	0
-8.74622	0	0	0	0	1e-05	-1e-05	0.00093	-0.00093
-8.72822	0	0	0	0	4e-05	-4e-05	0.00237	-0.00237
-8.71122	0	0	0	0	5e-05	-5e-05	0.00314	-0.00314
-8.69322	0	0	0	0	4e-05	-4e-05	0.00276	-0.00276
-8.67622	0	0	0	0	3e-05	-3e-05	0.00249	-0.00249
-8.65922	0	0	0	0	5e-05	-5e-05	0.00276	-0.00276
-8.64122	0	0	0	0	5e-05	-5e-05	0.00303	-0.00303
-8.62422	0	0	0	0	5e-05	-5e-05	0.0033	-0.0033
-8.60622	0	0	0	0	7e-05	-7e-05	0.00357	-0.00357
-8.58922	0	0	0	0	7e-05	-7e-05	0.00352	-0.00352
-8.57222	0	0	0	0	9e-05	-9e-05	0.00335	-0.00335
-8.55422	0	0	0	0	8e-05	-8e-05	0.00346	-0.00346
-8.53722	0	0	0	0	0.0001	-0.0001	0.00361	-0.00361
-8.51922	0	0	0	0	0.0001	-0.0001	0.00374	-0.00374
-8.50222	0	0	0	0	0.0001	-0.0001	0.00388	-0.00388
-8.48522	0	0	0	0	0.00013	-0.00013	0.00403	-0.00403
-8.46722	0	0	0	0	0.00013	-0.00013	0.00417	-0.00417
-8.45022	0	0	0	0	0.00013	-0.00013	0.00432	-0.00432
-8.43222	0	0	0	0	0.00016	-0.00016	0.00671	-0.00671
-8.41522	8e-05	-4e-05	0.00052	-0.00083	0.00018	-0.00018	0.00929	-0.00929
-8.39822	0.0002	-7e-05	0.00122	-0.00168	0.00017	-0.00017	0.01385	-0.01385
-8.38022	0.00023	-9e-05	0.00156	-0.00183	0.00019	-0.00019	0.02182	-0.02182
-8.36322	0.00019	-8e-05	0.00137	-0.0016	0.00025	-0.00025	0.03311	-0.03311
-8.34522	0.00017	-7e-05	0.00118	-0.00147	0.00041	-0.00041	0.05227	-0.05227
-8.32822	0.00017	-7e-05	0.00129	-0.00159	0.0006	-0.0006	0.07242	-0.07243
-8.31122	0.00017	-9e-05	0.0014	-0.00172	0.00077	-0.00077	0.09354	-0.09355
-8.29322	0.0002	-9e-05	0.00149	-0.00184	0.00098	-0.00098	0.11562	-0.11562
-8.27622	0.0002	-9e-05	0.0016	-0.00198	0.00118	-0.00118	0.13868	-0.13868
-8.25822	0.00021	-8e-05	0.00164	-0.00194	0.00156	-0.00156	0.18548	-0.18547
-8.24122	0.00019	-0.0001	0.0015	-0.00181	0.00253	-0.00253	0.29011	-0.29011
-8.22422	0.00018	-9e-05	0.0014	-0.00174	0.00282	-0.00282	0.32034	-0.32033
-8.20622	0.0002	-0.00011	0.0014	-0.00176	0.00311	-0.00311	0.35022	-0.35022
-8.18922	0.00019	-0.0001	0.00141	-0.00176	0.0034	-0.0034	0.37976	-0.37976
-8.17122	0.00021	-0.0001	0.0014	-0.00178	0.00369	-0.00369	0.40905	-0.40905
-8.15422	0.00023	-0.00012	0.00139	-0.00179	0.00398	-0.00398	0.43791	-0.43791
-8.13722	0.00023	-0.00012	0.00139	-0.0018	0.00837	-0.00837	0.84028	-0.84029
-8.11922	0.00024	-0.00012	0.00138	-0.00179	0.01371	-0.01371	1.32505	-1.32505
-8.10222	0.00026	-0.00014	0.00137	-0.00181	0.0265	-0.0265	2.50301	-2.50301
-8.08422	0.00025	-0.00013	0.00138	-0.00188	0.0329	-0.0329	2.98279	-2.98279
-8.06722	0.00025	-0.00011	0.00134	-0.00172	0.61995	-0.61995	52.0832	-52.0832
-8.05022	0.00021	-9e-05	0.00137	-0.00186	0.03131	-0.0313	2.42085	-2.42085
-8.03222	0.00019	-9e-05	0.00184	-0.00248	0.02211	-0.02211	1.66146	-1.66146
-8.01522	0.0002	-0.0001	0.00243	-0.00317	0.01418	-0.01418	1.01019	-1.01019
-7.99722	0.0002	-9e-05	0.00267	-0.00353	0.00857	-0.00857	0.54864	-0.54864
-7.98022	0.0002	-9e-05	0.00292	-0.0039	0.00862	-0.00862	0.52528	-0.52528
-7.96322	0.0002	-8e-05	0.00318	-0.00428	0.00867	-0.00867	0.50201	-0.50201
-7.94522	0.00019	-8e-05	0.00343	-0.00466	0.00871	-0.00871	0.47909	-0.47909
-7.92822	0.0002	-8e-05	0.00369	-0.00505	0.00878	-0.00878	0.45632	-0.45632
-7.91022	0.0002	-8e-05	0.00408	-0.00569	0.00884	-0.00884	0.43405	-0.43405
-7.89322	0.00025	-0.0001	0.00565	-0.00788	0.00892	-0.00892	0.41197	-0.41197
-7.87622	0.00024	-0.0001	0.00568	-0.00801	0.009	-0.009	0.39021	-0.39021
-7.85822	0.00025	-0.0001	0.0057	-0.00815	0.00908	-0.00908	0.36872	-0.36872
-7.84122	0.00025	-0.0001	0.00572	-0.00827	0.00917	-0.00917	0.34751	-0.34751
-7.82322	0.00025	-0.0001	0.00573	-0.00839	0.01211	-0.01211	0.3595	-0.3595
-7.80622	0.00024	-0.0001	0.00574	-0.00851	0.01053	-0.01053	0.24179	-0.24179
-7.78822	0.00023	-0.00014	0.00594	-0.01328	0.01099	-0.01099	0.21933	-0.21933
-7.77122	0.00027	-0.00037	0.00925	-0.03009	0.01348	-0.01348	0.26205	-0.26205
-7.75422	0.0003	-0.0008	0.01272	-0.06366	0.01607	-0.01607	0.30728	-0.30728
-7.73622	0.00041	-0.0009	0.01901	-0.07134	0.01878	-0.01878	0.35485	-0.35485
-7.71922	0.0004	-0.00101	0.02023	-0.07902	0.02163	-0.02163	0.40492	-0.40492
-7.70122	0.0004	-0.00115	0.02153	-0.08942	0.02456	-0.02456	0.45736	-0.45736
-7.68422	0.0004	-0.00132	0.02332	-0.10046	0.02694	-0.02694	0.50291	-0.50291
-7.66722	0.00054	-0.00162	0.02982	-0.12059	0.03221	-0.03221	0.60012	-0.60012
-7.64922	0.0007	-0.00195	0.03706	-0.14193	0.0378	-0.0378	0.70309	-0.70309
-7.63222	0.00087	-0.00221	0.04426	-0.15917	0.04371	-0.04371	0.81212	-0.81212
-7.61422	0.00149	-0.00317	0.06523	-0.2133	0.04991	-0.04991	0.92702	-0.92702
-7.59722	0.00289	-0.00458	0.1101	-0.2915	0.05645	-0.05645	1.0479	-1.0479
-7.58022	0.00435	-0.00607	0.15767	-0.37476	0.07127	-0.07127	1.32279	-1.32279
-7.56222	0.00592	-0.00768	0.20791	-0.46311	0.10287	-0.10287	1.91152	-1.91152
-7.54522	0.00756	-0.00938	0.26084	-0.5567	0.13032	-0.13032	2.42051	-2.42051
-7.52722	0.00928	-0.01117	0.31647	-0.65515	0.05871	-0.05871	1.07989	-1.07989
-7.51022	0.0111	-0.01305	0.37474	-0.75896	0.08614	-0.08614	1.57345	-1.57345
-7.49322	0.013	-0.01505	0.43587	-0.86763	0.24835	-0.24835	4.44521	-4.44521
-7.47522	0.01498	-0.01713	0.49948	-0.98145	0.0841	-0.0841	1.48385	-1.48385
-7.45822	0.01707	-0.03222	0.56591	-1.98748	0.07076	-0.07076	1.23269	-1.23269
-7.44022	0.02777	-0.08522	0.93346	-4.69677	0.05713	-0.05713	0.97055	-0.97055
-7.42322	0.05452	-0.8464	1.73624	-44.62	0.04927	-0.04927	0.80575	-0.80575
-7.40622	0.07573	-0.75699	2.36781	-36.6667	0.03921	-0.03921	0.65852	-0.65852
-7.38822	0.21665	-0.02788	6.75158	-1.22298	0.03678	-0.03678	0.61269	-0.61269
-7.37122	3.03297	-0.02591	88.8566	-1.12448	0.03194	-0.03194	0.52417	-0.52417
-7.35322	0.28508	-0.02403	7.95914	-1.02882	0.02941	-0.02941	0.47562	-0.47562
-7.33622	0.0704	-0.02217	1.82478	-0.9363	0.02696	-0.02696	0.42847	-0.42847
-7.31922	0.06455	-0.02036	1.60815	-0.84662	0.0246	-0.0246	0.38263	-0.38263
-7.30122	0.05904	-0.01861	1.40175	-0.75988	0.02316	-0.02316	0.35251	-0.35251
-7.28422	0.04478	-0.01426	1.01636	-0.58786	0.02129	-0.02129	0.31367	-0.31367
-7.26622	0.04421	-0.01343	0.95816	-0.54865	0.01856	-0.01856	0.25887	-0.25887
-7.24922	0.04378	-0.01263	0.90275	-0.51133	0.01549	-0.01549	0.19289	-0.19289
-7.23222	0.04349	-0.01187	0.85001	-0.47577	0.01369	-0.01369	0.16598	-0.16598
-7.21422	0.04332	-0.01115	0.80027	-0.44208	0.01191	-0.01191	0.13999	-0.13999
-7.19722	0.04329	-0.01047	0.75319	-0.41009	0.01016	-0.01016	0.11503	-0.11503
-7.17922	0.04338	-0.00983	0.70897	-0.38031	0.00843	-0.00843	0.09108	-0.09108
-7.16222	0.04539	-0.00932	0.67971	-0.3569	0.00674	-0.00674	0.06811	-0.06811
-7.14522	0.0477	-0.00887	0.65498	-0.33586	0.00579	-0.00579	0.05164	-0.05164
-7.12722	0.05028	-0.00846	0.6344	-0.31721	0.00737	-0.00737	0.04733	-0.04733
-7.11022	0.05322	-0.00826	0.62317	-0.30811	0.0095	-0.0095	0.04774	-0.04774
-7.09222	0.05638	-0.00839	0.63311	-0.31255	0.01198	-0.01198	0.05161	-0.05161
-7.07522	0.05964	-0.00854	0.64433	-0.3175	0.01506	-0.01506	0.0611	-0.0611
-7.05822	0.06867	-0.00902	0.70247	-0.33821	0.01803	-0.01803	0.06993	-0.06993
-7.04022	0.08537	-0.01186	0.8116	-0.42084	0.0209	-0.0209	0.07811	-0.07811
-7.02322	0.07658	-0.01189	0.67452	-0.37561	0.02608	-0.02608	0.08619	-0.08619
-7.00522	0.09356	-0.01249	0.81335	-0.44938	0.0243	-0.0243	0.07451	-0.07451
-6.98822	0.10677	-0.01365	0.90827	-0.49209	0.01541	-0.01541	0.04623	-0.04623
-6.97122	0.12072	-0.01485	1.01061	-0.53668	0.01531	-0.01531	0.04517	-0.04517
-6.95322	0.1267	-0.01608	1.05122	-0.58337	0.01552	-0.01552	0.04532	-0.04532
-6.93622	0.12675	-0.0173	1.0452	-0.63015	0.01583	-0.01583	0.04569	-0.04569
-6.91822	0.25765	-0.01791	2.14841	-0.65239	0.0161	-0.0161	0.04583	-0.04583
-6.90122	0.03036	-0.02072	0.2465	-0.7723	0.01354	-0.01354	0.03857	-0.03857
-6.88422	0.87695	-0.03579	7.11363	-1.42621	0.01327	-0.01327	0.03743	-0.03743
-6.86622	0.30026	-0.01072	2.44337	-0.42015	0.01237	-0.01237	0.03365	-0.03365
-6.84922	0.25359	-0.01114	2.05099	-0.44909	0.01155	-0.01155	0.03023	-0.03023
-6.83122	0.12214	-0.01996	0.94524	-0.82866	0.01197	-0.01197	0.03018	-0.03018
-6.81422	0.10374	-0.41804	0.79319	-16.7905	0.01258	-0.01258	0.03058	-0.03058
-6.79722	0.08623	-0.04126	0.65047	-1.61722	0.01334	-0.01334	0.03152	-0.03152
-6.77922	0.06979	-0.03153	0.51698	-1.21874	0.01407	-0.01407	0.03226	-0.03226
-6.76222	0.05437	-0.02282	0.39302	-0.86366	0.01471	-0.01471	0.03278	-0.03278
-6.74422	0.03995	-0.01509	0.27822	-0.55227	0.01508	-0.01508	0.03245	-0.03245
-6.72722	0.02979	-0.01106	0.19476	-0.39094	0.01513	-0.01513	0.03101	-0.03101
-6.71022	0.02788	-0.00919	0.14388	-0.30642	0.01825	-0.01825	0.03578	-0.03578
-6.69222	0.0276	-0.00744	0.11034	-0.22768	0.01784	-0.01784	0.0334	-0.0334
-6.67522	0.03136	-0.00851	0.10512	-0.19904	0.01745	-0.01745	0.03103	-0.03103
-6.65722	0.03771	-0.01229	0.11813	-0.25688	0.01937	-0.01937	0.03208	-0.03208
-6.64022	0.04366	-0.01684	0.12938	-0.34508	0.01887	-0.01887	0.02935	-0.02935
-6.62222	0.04919	-0.02094	0.13885	-0.41958	0.01667	-0.01667	0.02293	-0.02293
-6.60522	0.05605	-0.02431	0.1378	-0.45252	0.01675	-0.01675	0.01992	-0.01992
-6.58822	0.04763	-0.02211	0.10948	-0.37167	0.01607	-0.01607	0.01802	-0.01802
-6.57022	0.02919	-0.01599	0.0686	-0.25011	0.01526	-0.01526	0.01585	-0.01585
-6.55322	0.02875	-0.01231	0.06749	-0.18627	0.01787	-0.01787	0.01836	-0.01836
-6.53522	0.02832	-0.01194	0.0664	-0.1765	0.0178	-0.0178	0.01763	-0.01763
-6.51822	0.02873	-0.01189	0.06833	-0.17326	0.02195	-0.02195	0.02264	-0.02264
-6.50122	0.0291	-0.0119	0.06983	-0.17092	0.02149	-0.02149	0.02228	-0.02228
-6.48322	0.02481	-0.00854	0.05196	-0.12503	0.02021	-0.02021	0.02061	-0.02061
-6.46622	0.02517	-0.00881	0.05368	-0.12931	0.01897	-0.01897	0.01894	-0.01894
-6.44822	0.02374	-0.00786	0.0491	-0.11159	0.01773	-0.01773	0.01726	-0.01726
-6.43122	0.02174	-0.00714	0.04317	-0.0976	0.01652	-0.01652	0.01557	-0.01557
-6.41422	0.02053	-0.00673	0.03879	-0.08936	0.02061	-0.02061	0.01824	-0.01824
-6.39622	0.02098	-0.0063	0.03712	-0.08111	0.01795	-0.01795	0.01445	-0.01445
-6.37922	0.02215	-0.00637	0.03769	-0.079	0.00876	-0.00876	0.00628	-0.00628
-6.36122	0.02318	-0.00696	0.03811	-0.08376	0.00468	-0.00468	0.00354	-0.00354
-6.34422	0.02412	-0.0075	0.03838	-0.08774	0.00809	-0.00809	0.00819	-0.00819
-6.32722	0.02495	-0.00784	0.03848	-0.08811	0.01337	-0.01337	0.0116	-0.0116
-6.30922	0.02522	-0.00846	0.03786	-0.09311	0.02196	-0.02196	0.01662	-0.01662
-6.29222	0.02525	-0.00878	0.03667	-0.09365	0.03179	-0.03179	0.0189	-0.0189
-6.27422	0.03025	-0.00871	0.04007	-0.0888	0.03832	-0.03832	0.01686	-0.01686
-6.25722	0.02925	-0.01009	0.03763	-0.09827	0.03178	-0.03178	0.0131	-0.0131
-6.24022	0.0283	-0.00974	0.03514	-0.09067	0.0256	-0.0256	0.01068	-0.01068
-6.22222	0.02862	-0.00971	0.03378	-0.08465	0.01979	-0.01979	0.0086	-0.0086
-6.20522	0.03057	-0.01038	0.03422	-0.07881	0.02004	-0.02004	0.00871	-0.00871
-6.18722	0.02615	-0.00876	0.02573	-0.05919	0.02551	-0.02551	0.01127	-0.01127
-6.17022	0.02208	-0.00732	0.02048	-0.04598	0.04097	-0.04097	0.01415	-0.01415
-6.15322	0.02347	-0.00759	0.01981	-0.04253	0.03435	-0.03435	0.01359	-0.01359
-6.13522	0.02209	-0.00707	0.01766	-0.03695	0.03045	-0.03045	0.01162	-0.01162
-6.11822	0.0209	-0.00658	0.01564	-0.03169	0.03008	-0.03008	0.0115	-0.0115
-6.10022	0.02405	-0.00764	0.01786	-0.03546	0.03143	-0.03143	0.01177	-0.01177
-6.08322	0.02437	-0.00759	0.01721	-0.03415	0.03404	-0.03404	0.01191	-0.01191
-6.06622	0.03138	-0.00822	0.02017	-0.03797	0.03531	-0.03531	0.01113	-0.01113
-6.04822	0.03069	-0.00888	0.01965	-0.04297	0.0376	-0.0376	0.01037	-0.01037
-6.03122	0.02901	-0.00848	0.01829	-0.04088	0.04083	-0.04083	0.00889	-0.00889
-6.01322	0.02701	-0.00794	0.01669	-0.03746	0.05362	-0.05362	0.00808	-0.00808
-5.99622	0.02498	-0.00741	0.01509	-0.03398	0.03464	-0.03464	0.00615	-0.00615
-5.97922	0.0324	-0.00894	0.01775	-0.03998	0.03167	-0.03167	0.00694	-0.00694
-5.96122	0.02826	-0.00796	0.01471	-0.0336	0.0365	-0.0365	0.00769	-0.00769
-5.94422	0.02408	-0.00702	0.01173	-0.02727	0.05878	-0.05878	0.0101	-0.0101
-5.92622	0.01144	-0.0043	0.00631	-0.01528	0.10319	-0.10319	0.01019	-0.01019
-5.90922	0.00368	-0.00208	0.00362	-0.00675	0.07356	-0.07356	0.0112	-0.0112
-5.89222	0.00377	-0.00204	0.00367	-0.00625	0.12121	-0.12121	0.01112	-0.01112
-5.87422	0.01337	-0.00404	0.00879	-0.01589	0.14808	-0.14808	0.011	-0.011
-5.85722	0.02318	-0.00729	0.01205	-0.02589	0.09255	-0.09255	0.00592	-0.00592
-5.83922	0.03421	-0.00993	0.01589	-0.03327	0.11021	-0.11021	0.00597	-0.00597
-5.82222	0.04743	-0.01579	0.0156	-0.03334	0.17816	-0.17816	0.00712	-0.00712
-5.80522	0.03982	-0.01338	0.01229	-0.02584	0.24638	-0.24638	0.00754	-0.00754
-5.78722	0.03292	-0.01091	0.01008	-0.02056	0.17925	-0.17925	0.00455	-0.00455
-5.77022	0.02677	-0.00831	0.00844	-0.01619	0.16815	-0.16815	0.00937	-0.00937
-5.75222	0.02181	-0.0062	0.00701	-0.01279	0.19615	-0.19615	0.01067	-0.01067
-5.73522	0.02619	-0.00739	0.00856	-0.01437	0.28859	-0.28859	0.00833	-0.00833
-5.71822	0.03148	-0.00804	0.01121	-0.01669	0.34162	-0.34162	0.01708	-0.01708
-5.70022	0.04163	-0.01268	0.01266	-0.02139	0.22842	-0.22842	0.00971	-0.00971
-5.68322	0.03805	-0.01093	0.0117	-0.01951	0.20355	-0.20355	0.0132	-0.0132
-5.66522	0.03464	-0.00967	0.01032	-0.01727	0.0822	-0.0822	0.00284	-0.00284
-5.64822	0.03466	-0.00907	0.01008	-0.01641	0.3693	-0.36928	0.00874	-0.00874
-5.63122	0.03685	-0.00913	0.0101	-0.01658	0.39676	-0.39676	0.01304	-0.01304
-5.61322	0.03968	-0.00979	0.01009	-0.01682	0.27622	-0.27622	0.01049	-0.01049
-5.59622	0.04054	-0.01033	0.0096	-0.01624	0.29161	-0.29161	0.00928	-0.00928
-5.57822	0.04151	-0.01096	0.00911	-0.01527	0.32215	-0.32215	0.01035	-0.01035
-5.56122	0.04448	-0.01211	0.00877	-0.01447	0.25974	-0.25974	0.00846	-0.00846
-5.54422	0.05461	-0.01577	0.00799	-0.01195	0.1881	-0.1881	0.00631	-0.00631
-5.52622	0.03554	-0.00982	0.00588	-0.00869	0.21745	-0.21745	0.00723	-0.00723
-5.50922	0.03056	-0.00799	0.00573	-0.00908	0.30847	-0.30847	0.01042	-0.01042
-5.49122	0.03656	-0.0096	0.00646	-0.01053	0.22242	-0.22242	0.00529	-0.00529
-5.47422	0.04263	-0.015	0.00703	-0.0129	0.23557	-0.23557	0.00477	-0.00477
-5.45622	0.06964	-0.01612	0.00916	-0.01026	0.25447	-0.25447	0.00386	-0.00386
-5.43922	0.15471	-0.035	0.01341	-0.01341	0.35044	-0.35044	0.00403	-0.00403
-5.42222	0.07084	-0.01539	0.00619	-0.00921	0.65165	-0.65165	0.00765	-0.00765
-5.40422	0.14873	-0.04239	0.01601	-0.01815	0.49903	-0.49903	0.00747	-0.00747
-5.38722	0.08853	-0.02423	0.00798	-0.0094	0.49127	-0.49127	0.00719	-0.00719
-5.36922	0.0872	-0.02591	0.00656	-0.00625	0.52845	-0.52845	0.00829	-0.00829
-5.35222	0.10548	-0.03131	0.0082	-0.00746	0.50721	-0.50721	0.00599	-0.00599
-5.33522	0.27213	-0.04195	0.01178	-0.00811	0.59827	-0.59827	0.00578	-0.00578
-5.31722	0.28693	-0.03783	0.01194	-0.00941	1.21068	-1.21068	0.01246	-0.01246
-5.30022	0.20546	-0.02996	0.01332	-0.00718	0.83726	-0.83726	0.01265	-0.01265
-5.28222	0.2229	-0.03023	0.01483	-0.00497	1.27102	-1.27102	0.02359	-0.02359
-5.26522	0.32662	-0.03807	0.02383	-0.01517	0.74377	-0.74377	0.01197	-0.01197
-5.24822	0.37439	-0.03093	0.01513	-0.00542	0.60246	-0.60246	0.00964	-0.00964
-5.23022	0.37829	-0.05463	0.02532	-0.02497	0.88525	-0.88525	0.02113	-0.02113
-5.21322	0.31178	-0.0587	0.01795	-0.01722	0.60644	-0.60644	0.0142	-0.0142
-5.19522	0.44946	-0.03245	0.03822	-0.01037	0.65404	-0.65404	0.01214	-0.01214
-5.17822	0.24556	-0.00942	0.00935	-0.00508	0.68569	-0.68569	0.01605	-0.01605
-5.16122	0.49576	-0.06027	0.0251	-0.01167	0.71569	-0.71569	0.02226	-0.02226
-5.14322	0.44404	-0.04531	0.02102	-0.01325	0.55525	-0.55525	0.01807	-0.01807
-5.12622	0.26391	-0.03786	0.01162	-0.01411	0.55345	-0.55345	0.01518	-0.01518
-5.10822	0.28013	-0.03694	0.01302	-0.0149	0.62066	-0.62066	0.01594	-0.01594
-5.09122	0.30932	-0.04153	0.01474	-0.0134	0.92236	-0.92236	0.01206	-0.01206
-5.07422	0.31149	-0.04343	0.01342	-0.01292	0.72105	-0.72105	0.00966	-0.00966
-5.05622	0.24887	-0.03914	0.01033	-0.00964	1.64	-1.64	0.01855	-0.01855
-5.03922	0.41579	-0.03139	0.01029	-0.00809	0.9631	-0.9631	0.01532	-0.01532
-5.02122	0.53967	-0.04392	0.01415	-0.01386	2.98445	-2.98445	0.01585	-0.01585
-5.00422	0.16448	-0.02728	0.00807	-0.01005	1.11277	-1.11277	0.01559	-0.01559
-4.98722	0.17512	-0.02424	0.00737	-0.00895	1.4206	-1.4206	0.01503	-0.01503
-4.96922	0.20917	-0.03336	0.00673	-0.01463	1.88048	-1.88048	0.01622	-0.01622
-4.95222	0.28564	-0.02668	0.00746	-0.01079	1.25482	-1.25482	0.01287	-0.01287
-4.93422	0.3996	-0.0296	0.00808	-0.00636	1.4123	-1.4123	0.01596	-0.01596
-4.91722	0.66538	-0.05593	0.01778	-0.0073	1.01228	-1.01228	0.01912	-0.01912
-4.90022	0.51864	-0.0844	0.01624	-0.01169	1.93326	-1.93326	0.01746	-0.01746
-4.88222	0.5851	-0.05474	0.01257	-0.00958	1.0748	-1.0748	0.01341	-0.01341
-4.86522	0.56213	-0.05633	0.01142	-0.01004	1.19079	-1.19079	0.01744	-0.01744
-4.84722	0.69562	-0.06726	0.01261	-0.01145	1.16558	-1.16558	0.01882	-0.01882
-4.83022	0.72982	-0.05842	0.01067	-0.01077	1.53556	-1.53556	0.02659	-0.02659
-4.81322	0.90284	-0.06819	0.0133	-0.00911	1.32102	-1.32102	0.01546	-0.01546
-4.79522	0.76904	-0.08823	0.01881	-0.01125	1.2173	-1.2173	0.0216	-0.0216
-4.77822	1.21737	-0.06504	0.02224	-0.00988	1.39502	-1.39502	0.02601	-0.02601
-4.76022	0.82413	-0.09853	0.01395	-0.01999	2.14072	-2.14072	0.02738	-0.02738
-4.74322	0.50612	-0.10664	0.01012	-0.03268	1.69792	-1.69792	0.02175	-0.02175
-4.72622	0.91386	-0.07931	0.01749	-0.01773	1.03254	-1.03254	0.0134	-0.0134
-4.70822	0.60737	-0.09261	0.01637	-0.02427	1.7685	-1.7685	0.02302	-0.02302
-4.69122	0.67522	-0.08106	0.01408	-0.02482	2.39226	-2.39225	0.01679	-0.01679
-4.67322	0.54328	-0.07028	0.01313	-0.02423	1.7922	-1.7922	0.01652	-0.01652
-4.65622	0.65011	-0.05842	0.01868	-0.01738	1.04683	-1.04683	0.0117	-0.0117
-4.63922	0.5965	-0.0822	0.02245	-0.02672	1.11144	-1.11144	0.01129	-0.01129
-4.62122	0.51727	-0.0831	0.02141	-0.02869	1.11302	-1.11302	0.00932	-0.00932
-4.60422	0.59255	-0.06158	0.02392	-0.01803	1.10423	-1.10423	0.00616	-0.00616
-4.58622	0.7912	-0.07967	0.02797	-0.01781	1.35967	-1.35967	0.00631	-0.00631
-4.56922	1.0664	-0.09736	0.01712	-0.03867	1.40599	-1.40599	0.0097	-0.0097
-4.55222	0.78602	-0.08196	0.01032	-0.03756	0.9243	-0.9243	0.00885	-0.00885
-4.53422	1.1701	-1.04979	0.03401	-0.24457	0.8614	-0.8614	0.0087	-0.0087
-4.51722	1.99051	-0.0734	0.02126	-0.01703	1.3043	-1.3043	0.01115	-0.01115
-4.49922	1.16782	-0.21152	0.02552	-0.02635	2.3763	-2.3763	0.01389	-0.01389
-4.48222	1.15183	-0.10149	0.01439	-0.05409	2.4889	-2.4889	0.0148	-0.0148
-4.46522	0.95467	-0.12139	0.02002	-0.01371	1.1549	-1.1549	0.01197	-0.01197
-4.44722	1.89279	-0.13334	0.02098	-0.0205	1.1533	-1.1533	0.01201	-0.01201
-4.43022	0.71419	-0.12151	0.01813	-0.02623	1.4064	-1.4064	0.01485	-0.01485
-4.41222	0.87277	-0.07924	0.01693	-0.01368	1.0793	-1.0793	0.01535	-0.01535
-4.39522	0.669	-0.09794	0.02446	-0.01914	1.08977	-1.08977	0.01405	-0.01405
-4.37822	1.759	-0.21998	0.0295	-0.02527	1.7244	-1.7244	0.01397	-0.01397
-4.36022	0.75272	-0.11389	0.01311	-0.00915	1.3747	-1.3747	0.01582	-0.01582
-4.34322	0.64739	-0.08432	0.01701	-0.00755	2.3442	-2.3442	0.02051	-0.02051
-4.32522	0.65947	-0.10269	0.01828	-0.00937	1.9494	-1.9494	0.01967	-0.01967
-4.30822	0.92657	-0.10569	0.02702	-0.00976	1.70384	-1.70384	0.01287	-0.01287
-4.29022	1.26867	-0.14235	0.03669	-0.01152	2.9938	-2.9938	0.0162	-0.0162
-4.27322	0.97903	-0.1569	0.02658	-0.01518	3.6728	-3.6728	0.02696	-0.02696
-4.25622	0.59318	-0.0818	0.02474	-0.00634	1.455	-1.455	0.01659	-0.01659
-4.23822	0.60391	-0.08151	0.02218	-0.0058	1.9805	-1.9805	0.02832	-0.02832
-4.22122	2.13454	-0.11746	0.07583	-0.00622	4.321	-4.321	0.05624	-0.05624
-4.20322	1.47777	-0.2836	0.04108	-0.01385	5.746	-5.746	0.05624	-0.05624
-4.18622	0.9354	-0.18265	0.0217	-0.00942	5.2598	-5.2598	0.0782	-0.0782
-4.16922	1.3622	-0.13411	0.0321	-0.00846	5.2348	-5.2347	0.09466	-0.09466
-4.15122	1.9555	-0.14163	0.03538	-0.00842	3.6607	-3.6607	0.03319	-0.03319
-4.13422	2.1961	-0.1906	0.05079	-0.0092	3.9325	-3.9325	0.06495	-0.06495
-4.11622	0.95042	-0.2989	0.02395	-0.01002	3.4512	-3.4512	0.03741	-0.03741
-4.09922	1.09396	-0.21185	0.02297	-0.00696	2.3791	-2.3791	0.03642	-0.03642
-4.08222	1.0652	-0.23415	0.02063	-0.00777	2.2412	-2.2412	0.03254	-0.03254
-4.06422	0.991	-0.22051	0.0169	-0.00885	1.31425	-1.31425	0.01601	-0.016
-4.04722	1.3939	-0.07999	0.01677	-0.00467	2.67247	-2.67247	0.04932	-0.04932
-4.02922	1.19332	-0.10533	0.01772	-0.00706	4.4751	-4.4751	0.09889	-0.09889
-4.01222	1.3053	-0.09082	0.02658	-0.00618	7.1965	-7.1965	0.15201	-0.15201
-3.99522	1.3347	-0.16334	0.04181	-0.00743	3.13	-3.13	0.05648	-0.05648
-3.97722	1.05218	-0.10164	0.01136	-0.00442	1.6471	-1.6471	0.02893	-0.02893
-3.96022	2.746	-0.07628	0.03067	-0.00458	2.976	-2.976	0.05888	-0.05888
-3.94222	2.6538	-0.10407	0.03333	-0.00582	1.79761	-1.79761	0.02942	-0.02942
-3.92522	1.3519	-0.12495	0.01939	-0.00395	2.3934	-2.3934	0.04085	-0.04085
-3.90822	0.76328	-0.22388	0.02373	-0.00655	1.8886	-1.8886	0.03001	-0.03001
-3.89022	0.9508	-0.09864	0.0279	-0.00516	2.5122	-2.5122	0.03661	-0.03661
-3.87322	1.1759	-0.09437	0.0337	-0.00462	1.53516	-1.53516	0.02067	-0.02067
-3.85522	0.8665	-0.15794	0.02634	-0.0043	1.18209	-1.18209	0.01454	-0.01454
-3.83822	0.76836	-0.08085	0.02366	-0.00206	3.1794	-3.1794	0.0517	-0.0517
-3.82122	1.3439	-0.05326	0.02761	-0.00198	4.3426	-4.3426	0.08312	-0.08312
-3.80322	1.29205	-0.10494	0.02806	-0.00509	3.0337	-3.0337	0.05496	-0.05496
-3.78622	1.7184	-0.09599	0.02521	-0.0053	2.8721	-2.8721	0.04721	-0.04721
-3.76822	1.9534	-0.10118	0.01896	-0.00427	3.67245	-3.67245	0.03781	-0.03781
-3.75122	1.7992	-0.10008	0.02042	-0.00813	3.5127	-3.5127	0.04493	-0.04493
-3.73422	2.86364	-0.09982	0.01688	-0.00449	2.22093	-2.22093	0.02751	-0.02751
-3.71622	2.6453	-0.06797	0.03232	-0.00486	3.716	-3.716	0.04097	-0.04097
-3.69922	0.97395	-0.12309	0.02044	-0.01031	2.4739	-2.4739	0.02655	-0.02655
-3.68122	1.2993	-0.07046	0.02421	-0.00302	1.5899	-1.5899	0.03159	-0.03159
-3.66422	1.54079	-0.09585	0.02361	-0.00693	3.8302	-3.8302	0.04989	-0.04989
-3.64722	3.1723	-0.09417	0.04388	-0.00883	1.9543	-1.9543	0.04186	-0.04186
-3.62922	2.5194	-0.10319	0.05381	-0.00571	2.3448	-2.3448	0.05494	-0.05494
-3.61222	2.1326	-0.12152	0.06785	-0.00926	0.98263	-0.98263	0.02049	-0.02049
-3.59422	4.2198	-0.207	0.15568	-0.0215	1.5781	-1.5781	0.06025	-0.06025
-3.57722	2.0208	-0.13824	0.04759	-0.01537	1.2192	-1.2193	0.03173	-0.03173
-3.56022	2.9215	-0.19926	0.11078	-0.02449	0.89821	-0.89821	0.01751	-0.01751
-3.54222	1.9196	-0.18323	0.03549	-0.01538	1.83749	-1.83749	0.04278	-0.04278
-3.52522	1.601	-0.16174	0.04702	-0.0102	1.06394	-1.06394	0.02492	-0.02492
-3.50722	1.76366	-0.31443	0.04378	-0.00945	1.2471	-1.2471	0.02528	-0.02528
-3.49022	0.96503	-0.29084	0.02608	-0.01442	1.4537	-1.4537	0.02581	-0.02581
-3.47322	1.2991	-0.08571	0.06027	-0.00431	1.6114	-1.6114	0.03645	-0.03645
-3.45522	3.0355	-0.14028	0.15078	-0.00881	2.002	-2.002	0.05374	-0.05374
-3.43822	2.7253	-0.2221	0.14726	-0.01213	1.2524	-1.2524	0.02909	-0.02909
-3.42022	2.5991	-0.1711	0.10831	-0.01038	1.5739	-1.5739	0.02302	-0.02302
-3.40322	2.0255	-0.21789	0.067	-0.0145	1.7289	-1.7289	0.03487	-0.03487
-3.38622	1.53505	-0.34764	0.05468	-0.02443	2.0058	-2.0058	0.04425	-0.04425
-3.36822	1.57994	-0.17059	0.05059	-0.01172	3.3585	-3.3585	0.09074	-0.09074
-3.35122	1.1888	-0.15794	0.04043	-0.01003	1.9386	-1.9386	0.0395	-0.0395
-3.33322	1.40739	-0.16148	0.04765	-0.00607	2.2478	-2.2478	0.04423	-0.04423
-3.31622	1.7478	-0.17755	0.04272	-0.00842	1.8184	-1.8184	0.03371	-0.03371
-3.29922	1.9577	-0.14542	0.05032	-0.00666	1.789	-1.789	0.0377	-0.0377
-3.28122	2.31316	-0.1434	0.06777	-0.00525	1.3724	-1.3724	0.02622	-0.02622
-3.26422	1.8326	-0.12039	0.02886	-0.00449	1.4899	-1.4899	0.03284	-0.03284
-3.24622	1.1893	-0.08067	0.0227	-0.00334	1.6165	-1.6165	0.03219	-0.03219
-3.22922	0.6792	-0.06388	0.01673	-0.00385	1.5859	-1.5859	0.03287	-0.03287
-3.21222	1.00462	-0.08375	0.0296	-0.00625	2.1313	-2.1313	0.02327	-0.02327
-3.19422	1.83308	-0.15417	0.06641	-0.01499	1.36234	-1.36234	0.03051	-0.03051
-3.17722	2.84745	-0.16563	0.09489	-0.01883	1.1838	-1.1838	0.02829	-0.02829
-3.15922	2.51913	-0.3507	0.08259	-0.03309	1.6606	-1.6606	0.02581	-0.02581
-3.14222	2.15237	-0.21997	0.06822	-0.02376	1.5889	-1.5889	0.02383	-0.02383
-3.12422	3.7454	-0.10834	0.08635	-0.01394	1.6831	-1.6831	0.03969	-0.03969
-3.10722	4.1004	-0.18384	0.10668	-0.02752	2.392	-2.392	0.03105	-0.03105
-3.09022	2.2318	-0.15311	0.06864	-0.02096	1.8607	-1.8607	0.05009	-0.05009
-3.07222	2.41968	-0.17968	0.07664	-0.01679	1.3916	-1.3916	0.03734	-0.03734
-3.05522	4.5895	-0.3583	0.10143	-0.01888	1.7883	-1.7883	0.05823	-0.05823
-3.03722	2.1239	-0.20003	0.07741	-0.01644	1.22874	-1.22874	0.04034	-0.04034
-3.02022	2.5952	-0.19846	0.12892	-0.01555	1.63136	-1.63136	0.06098	-0.06098
-3.00322	1.56781	-0.30327	0.05689	-0.01421	0.87336	-0.87336	0.02701	-0.02701
-2.98522	2.1227	-0.29964	0.10676	-0.01904	1.4278	-1.4278	0.04164	-0.04164
-2.96822	1.5288	-0.3106	0.07463	-0.01822	1.0943	-1.0943	0.04539	-0.04539
-2.95022	1.13965	-0.30464	0.05202	-0.01899	1.728	-1.728	0.07421	-0.07421
-2.93322	1.4976	-0.22109	0.06581	-0.01738	0.9041	-0.9041	0.02018	-0.02018
-2.91622	1.13678	-0.35417	0.05256	-0.02189	1.4177	-1.4177	0.0538	-0.0538
-2.89822	1.4833	-0.39378	0.06593	-0.02212	1.335	-1.335	0.02387	-0.02387
-2.88122	1.7301	-0.35321	0.04867	-0.02477	0.9937	-0.9937	0.03586	-0.03586
-2.86322	1.7147	-0.46681	0.07853	-0.03273	0.84011	-0.84011	0.01005	-0.01005
-2.84622	2.2013	-0.3393	0.07303	-0.03347	0.76609	-0.76609	0.01621	-0.01621
-2.82922	1.6243	-0.31394	0.08828	-0.03484	0.54364	-0.54364	0.01464	-0.01464
-2.81122	1.4946	-0.24056	0.04986	-0.02361	0.40781	-0.40781	0.01696	-0.01696
-2.79422	1.6932	-0.21962	0.04885	-0.02234	0.43822	-0.43822	0.01748	-0.01748
-2.77622	1.5085	-0.14365	0.06049	-0.01537	0.39153	-0.39153	0.02038	-0.02038
-2.75922	2.2723	-0.44724	0.11447	-0.03685	0.30169	-0.30169	0.01792	-0.01792
-2.74222	1.4855	-0.21452	0.06739	-0.02518	0.24377	-0.24377	0.01503	-0.01503
-2.72422	2.6316	-0.17491	0.12984	-0.01903	0.18038	-0.18038	0.01365	-0.01365
-2.70722	2.0672	-0.2746	0.09635	-0.03559	0.26055	-0.26055	0.01835	-0.01835
-2.68922	2.079	-0.2414	0.08011	-0.02951	0.32457	-0.32457	0.02328	-0.02328
-2.67222	2.0221	-0.22644	0.0925	-0.0277	0.20673	-0.20673	0.01641	-0.01641
-2.65522	1.9578	-0.40352	0.09136	-0.06415	0.10398	-0.10398	0.00722	-0.00722
-2.63722	1.6965	-0.28232	0.0785	-0.03932	0.36828	-0.36828	0.01704	-0.01704
-2.62022	2.2066	-0.23986	0.10168	-0.04121	0.14814	-0.14814	0.00932	-0.00932
-2.60222	1.9986	-0.18271	0.09222	-0.03324	0.34125	-0.34125	0.02678	-0.02678
-2.58522	2.3874	-0.2783	0.08038	-0.03562	0.24847	-0.24847	0.01442	-0.01442
-2.56822	2.3297	-0.26791	0.08648	-0.03296	0.15857	-0.15857	0.00982	-0.00982
-2.55022	1.93147	-0.16524	0.08669	-0.02198	0.13997	-0.13997	0.00877	-0.00877
-2.53322	2.5304	-0.24985	0.0814	-0.02442	0.11702	-0.11702	0.00709	-0.00709
-2.51522	3.1383	-0.30076	0.10079	-0.03902	0.08444	-0.08444	0.00941	-0.00941
-2.49822	2.8325	-0.2011	0.11285	-0.02655	0.0973	-0.0973	0.01299	-0.01299
-2.48122	2.7996	-0.12824	0.11422	-0.0255	0.11903	-0.11903	0.01646	-0.01646
-2.46322	4.3903	-0.23568	0.15897	-0.05364	0.11744	-0.11744	0.01612	-0.01612
-2.44622	2.8369	-0.18893	0.09221	-0.0314	0.10467	-0.10467	0.01524	-0.01524
-2.42822	3.7625	-0.22734	0.15619	-0.0224	0.11363	-0.11363	0.01704	-0.01704
-2.41122	1.6895	-0.15727	0.06012	-0.01917	0.11137	-0.11137	0.017	-0.017
-2.39422	2.3561	-0.14786	0.08596	-0.02349	0.12663	-0.12663	0.01963	-0.01963
-2.37622	1.7911	-0.19274	0.09926	-0.02107	0.14324	-0.14324	0.02267	-0.02267
-2.35922	1.1611	-0.4716	0.03559	-0.03661	0.13647	-0.13647	0.02211	-0.02211
-2.34122	1.5216	-0.35997	0.05213	-0.03562	0.13244	-0.13244	0.02368	-0.02368
-2.32422	1.4595	-0.18049	0.05187	-0.0248	0.12912	-0.12912	0.02313	-0.02313
-2.30722	2.2737	-0.16219	0.10236	-0.01837	0.12271	-0.12271	0.02329	-0.02329
-2.28922	1.3999	-0.18607	0.05216	-0.01609	0.10707	-0.10707	0.021	-0.021
-2.27222	1.5539	-0.89408	0.05905	-0.08548	0.08947	-0.08947	0.01864	-0.01864
-2.25422	1.7071	-0.18779	0.0625	-0.02012	0.07362	-0.07362	0.01575	-0.01575
-2.23722	1.50403	-0.3448	0.05648	-0.03459	0.06148	-0.06148	0.01359	-0.01359
-2.22022	1.81031	-0.2227	0.0515	-0.01928	0.05295	-0.05295	0.01215	-0.01215
-2.20222	1.3017	-0.13505	0.04233	-0.01111	0.05179	-0.05179	0.01226	-0.01226
-2.18522	0.99685	-0.10027	0.03459	-0.00807	0.06702	-0.06702	0.01448	-0.01448
-2.16722	0.56819	-0.08053	0.02444	-0.00701	0.07373	-0.07373	0.01533	-0.01533
-2.15022	0.59138	-0.05329	0.02737	-0.00718	0.0453	-0.0453	0.00828	-0.00828
-2.13322	0.51312	-0.05161	0.02813	-0.00594	0.05288	-0.05288	0.00981	-0.00981
-2.11522	0.41271	-0.05441	0.02928	-0.0054	0.06021	-0.06021	0.01135	-0.01135
-2.09822	0.32406	-0.05874	0.02722	-0.00538	0.06347	-0.06347	0.01255	-0.01255
-2.08022	0.23487	-0.0657	0.02202	-0.00558	0.06733	-0.06733	0.01387	-0.01387
-2.06322	0.21924	-0.10059	0.01955	-0.00682	0.06687	-0.06687	0.01469	-0.01469
-2.04622	0.32393	-0.10005	0.02291	-0.00594	0.09293	-0.09293	0.02693	-0.02693
-2.02822	0.34395	-0.09572	0.03048	-0.00678	0.06794	-0.06794	0.01575	-0.01575
-2.01122	0.29994	-0.11469	0.03097	-0.0083	0.07493	-0.07493	0.01688	-0.01688
-1.99322	0.33722	-0.12782	0.01619	-0.00546	0.08205	-0.08205	0.01802	-0.01802
-1.97622	0.26295	-0.19577	0.0157	-0.00768	0.0893	-0.0893	0.01921	-0.01921
-1.95822	0.18793	-0.10951	0.01188	-0.00755	0.0658	-0.0658	0.01385	-0.01385
-1.94122	0.35154	-0.10908	0.01915	-0.00701	0.05334	-0.05334	0.01209	-0.01209
-1.92422	0.29559	-0.10531	0.01939	-0.00715	0.05274	-0.05274	0.01201	-0.01201
-1.90622	0.20979	-0.13075	0.01463	-0.00892	0.05202	-0.05202	0.01191	-0.01191
-1.88922	0.18868	-0.15526	0.01357	-0.01082	0.04427	-0.04427	0.01173	-0.01173
-1.87122	0.16458	-0.19676	0.01107	-0.01325	0.04791	-0.04791	0.01275	-0.01275
-1.85422	0.07576	-0.2441	0.01006	-0.01597	0.0598	-0.0598	0.01613	-0.01613
-1.83722	0.0657	-0.29572	0.0096	-0.0189	0.06967	-0.06967	0.01759	-0.01759
-1.81922	0.06211	-0.3166	0.00921	-0.02127	0.05081	-0.05081	0.01302	-0.01302
-1.80222	0.08694	-0.37182	0.01294	-0.02496	0.0464	-0.0464	0.01229	-0.01229
-1.78422	0.11502	-0.60413	0.01797	-0.04092	0.04865	-0.04865	0.01346	-0.01346
-1.76722	0.12626	-0.69257	0.02031	-0.04779	0.05105	-0.05105	0.01449	-0.01449
-1.75022	0.13097	-0.91533	0.02092	-0.06519	0.08309	-0.08309	0.02159	-0.02159
-1.73222	0.13219	-1.14431	0.02121	-0.08068	0.06373	-0.06373	0.01824	-0.01824
-1.71522	0.14492	-1.3837	0.02381	-0.09705	0.06228	-0.06228	0.01787	-0.01787
-1.69722	0.16524	-1.78142	0.02757	-0.12323	0.05651	-0.05651	0.01677	-0.01677
-1.68022	0.1453	-2.08456	0.02563	-0.14693	0.05383	-0.05383	0.01661	-0.01661
-1.66322	0.15091	-1.91772	0.02866	-0.13904	0.05151	-0.05151	0.01661	-0.01661
-1.64522	0.14822	-2.05084	0.02835	-0.14933	0.04921	-0.04921	0.01664	-0.01664
-1.62822	0.15367	-2.02392	0.02982	-0.14519	0.04816	-0.04816	0.01693	-0.01693
-1.61022	0.14621	-2.02785	0.03029	-0.14441	0.04625	-0.04625	0.01683	-0.01683
-1.59322	0.12595	-2.09094	0.02694	-0.14845	0.04398	-0.04398	0.01652	-0.01652
-1.57622	0.10649	-3.46866	0.02351	-0.25478	0.04416	-0.04416	0.01667	-0.01667
-1.55822	0.08949	-12.0953	0.02049	-0.91826	0.04188	-0.04188	0.01569	-0.01569
-1.54122	0.07701	-10.1291	0.01825	-0.7686	0.04204	-0.04204	0.01583	-0.01583
-1.52322	0.07296	-7.12626	0.01694	-0.54891	0.04243	-0.04243	0.01606	-0.01606
-1.50622	0.07519	-3.60413	0.01717	-0.3035	0.0475	-0.0475	0.01772	-0.01772
-1.48922	0.08826	-2.48983	0.01855	-0.21093	0.11853	-0.11853	0.04719	-0.04719
-1.47122	0.0878	-1.75188	0.01876	-0.1564	0.07712	-0.07712	0.03455	-0.03455
-1.45422	0.05857	-1.63644	0.01214	-0.15255	0.04462	-0.04462	0.01993	-0.01993
-1.43622	0.06396	-1.39888	0.01317	-0.13198	0.03793	-0.03793	0.01618	-0.01618
-1.41922	0.07035	-1.25752	0.01439	-0.11907	0.04259	-0.04259	0.01791	-0.01791
-1.40222	0.07183	-1.06649	0.01527	-0.1031	0.04475	-0.04475	0.01711	-0.01711
-1.38422	0.07223	-0.90761	0.01616	-0.08993	0.03305	-0.03305	0.01374	-0.01374
-1.36722	0.07016	-1.37068	0.01635	-0.11593	0.02834	-0.02834	0.01287	-0.01287
-1.34922	0.1185	-0.91255	0.02575	-0.08626	0.02716	-0.02716	0.01354	-0.01354
-1.33222	0.09022	-1.08934	0.01935	-0.10372	0.02923	-0.02923	0.01601	-0.01601
-1.31522	0.08366	-0.83856	0.01724	-0.08058	0.02665	-0.02665	0.01696	-0.01696
-1.29722	0.09001	-0.8241	0.01846	-0.07985	0.03014	-0.03014	0.02029	-0.0203
-1.28022	0.09623	-0.7207	0.01967	-0.06991	0.02967	-0.02967	0.02089	-0.02089
-1.26222	0.10224	-0.59765	0.02086	-0.05805	0.02916	-0.02916	0.02148	-0.02148
-1.24522	0.09772	-0.54896	0.02045	-0.05357	0.02862	-0.02862	0.02209	-0.02209
-1.22822	0.07146	-0.50642	0.01552	-0.04906	0.02822	-0.02822	0.02275	-0.02275
-1.21022	0.0704	-0.48012	0.01527	-0.04638	0.0294	-0.0294	0.0234	-0.0234
-1.19322	0.06357	-0.53506	0.01562	-0.05568	0.03287	-0.03287	0.02368	-0.02368
-1.17522	0.06013	-0.43496	0.01382	-0.04247	0.04878	-0.04878	0.04112	-0.04112
-1.15822	0.07101	-0.42508	0.01677	-0.03916	0.03897	-0.03897	0.03259	-0.03259
-1.14122	0.08501	-0.45363	0.01967	-0.03908	0.03676	-0.03676	0.02739	-0.02739
-1.12322	0.07197	-0.4017	0.01776	-0.03526	0.03934	-0.03934	0.02619	-0.02619
-1.10622	0.05472	-0.36734	0.01304	-0.03414	0.04193	-0.04193	0.02526	-0.02526
-1.08822	0.05674	-0.36038	0.01414	-0.03358	0.03874	-0.03874	0.02265	-0.02265
-1.07122	0.05896	-0.32392	0.01528	-0.02961	0.05671	-0.05671	0.03393	-0.03393
-1.05422	0.06109	-0.31046	0.01628	-0.02723	0.05637	-0.05637	0.03772	-0.03772
-1.03622	0.06332	-0.28996	0.01726	-0.02484	0.05095	-0.05095	0.03479	-0.03479
-1.01922	0.08995	-0.25627	0.02346	-0.02113	0.04575	-0.04575	0.03193	-0.03193
-1.00122	0.08269	-0.24178	0.02149	-0.01989	0.04075	-0.04075	0.02911	-0.02911
-0.98422	0.07977	-0.24863	0.02128	-0.02011	0.036	-0.036	0.02635	-0.02635
-0.96722	0.0703	-0.25566	0.01931	-0.02033	0.03537	-0.03537	0.0267	-0.0267
-0.94922	0.06756	-0.26285	0.01913	-0.02056	0.02475	-0.02475	0.02017	-0.02017
-0.93222	0.06488	-0.27097	0.01896	-0.02076	0.02368	-0.02368	0.0198	-0.0198
-0.91422	0.06286	-0.26686	0.01894	-0.02013	0.02343	-0.02343	0.02048	-0.02048
-0.89722	0.06081	-0.2623	0.01882	-0.01949	0.02431	-0.02431	0.02643	-0.02643
-0.88022	0.05766	-0.24416	0.01838	-0.01662	0.0242	-0.0242	0.02825	-0.02825
-0.86222	0.05677	-0.24349	0.01831	-0.01642	0.03667	-0.03667	0.04408	-0.04408
-0.84522	0.05139	-0.33577	0.01658	-0.01828	0.02672	-0.02672	0.03618	-0.03618
-0.82722	0.05036	-0.94131	0.01649	-0.04241	0.02883	-0.02883	0.0395	-0.0395
-0.81022	0.04945	-0.70242	0.01644	-0.02733	0.03107	-0.03107	0.04278	-0.04278
-0.79222	0.05012	-0.31028	0.01679	-0.01785	0.03756	-0.03756	0.04861	-0.04861
-0.77522	0.0544	-0.39717	0.01829	-0.03228	0.05447	-0.05438	0.05961	-0.05956
-0.75822	0.11269	-0.43241	0.0382	-0.03105	0.04847	-0.04847	0.0607	-0.0607
-0.74022	0.07959	-0.26811	0.03165	-0.01544	0.03961	-0.03961	0.06432	-0.06432
-0.72322	0.06487	-0.27924	0.02735	-0.01524	0.03614	-0.03614	0.0712	-0.0712
-0.70522	0.0526	-0.31223	0.0221	-0.01513	0.03454	-0.03454	0.08332	-0.08332
-0.68822	0.04919	-0.34593	0.02012	-0.01501	0.03079	-0.03079	0.07294	-0.07294
-0.67122	0.04926	-0.38044	0.01869	-0.01484	0.05444	-0.05444	0.07742	-0.07742
-0.65322	0.03816	-0.53743	0.01506	-0.01795	0.0433	-0.0433	0.06985	-0.06985
-0.63622	0.03651	-0.53091	0.0147	-0.01565	0.0348	-0.0348	0.06618	-0.06618
-0.61822	0.03462	-0.58585	0.01469	-0.01587	0.03058	-0.03058	0.06129	-0.06129
-0.60122	0.03359	-0.65111	0.01542	-0.01606	0.02654	-0.02654	0.05647	-0.05647
-0.58422	0.03035	-0.7618	0.01554	-0.02131	0.02302	-0.02302	0.05225	-0.05225
-0.56622	0.03107	-0.82616	0.01657	-0.02016	0.02166	-0.02166	0.0519	-0.0519
-0.54922	0.03484	-0.5201	0.0188	-0.01787	0.02674	-0.02674	0.06278	-0.06277
-0.53122	0.03445	-0.92487	0.01888	-0.02308	0.03171	-0.03171	0.0744	-0.0744
-0.51422	0.03401	-0.96301	0.01896	-0.02232	0.03459	-0.03459	0.09715	-0.09715
-0.49722	0.03357	-0.69978	0.01906	-0.01449	0.03469	-0.03469	0.10858	-0.10858
-0.47922	0.03458	-0.60915	0.01918	-0.01273	0.03133	-0.03133	0.10765	-0.10765
-0.46222	0.03765	-0.50056	0.01925	-0.01177	0.02813	-0.02813	0.10709	-0.10709
-0.44422	0.0374	-0.51868	0.01803	-0.01356	0.03162	-0.03162	0.11762	-0.11762
-0.42722	0.05627	-0.5315	0.03456	-0.01498	0.034	-0.034	0.13021	-0.13021
-0.41022	0.04237	-0.55365	0.02851	-0.01668	0.03697	-0.03697	0.14679	-0.14679
-0.39222	0.04008	-0.68555	0.02598	-0.02092	0.04833	-0.04832	0.15124	-0.15124
-0.37522	0.04057	-0.6633	0.02436	-0.02233	0.05983	-0.05983	0.15236	-0.15236
-0.35722	0.04142	-0.69161	0.02316	-0.02342	0.06674	-0.06674	0.1752	-0.1752
-0.34022	0.04127	-0.75547	0.0216	-0.02332	0.0607	-0.0607	0.21506	-0.21506
-0.32322	0.0461	-0.83911	0.02502	-0.02272	0.03893	-0.03893	0.08951	-0.08951
-0.30522	0.06521	-0.90503	0.03773	-0.01948	0.04358	-0.04358	0.10843	-0.10843
-0.28822	0.05839	-0.79097	0.03439	-0.01452	0.04335	-0.04335	0.11147	-0.11147
-0.27022	0.05333	-0.78842	0.03205	-0.01293	0.04308	-0.04308	0.11588	-0.11588
-0.25322	0.04832	-0.78524	0.02971	-0.0112	0.05049	-0.05049	0.13453	-0.13453
-0.23622	0.04336	-0.78318	0.02733	-0.00969	0.04532	-0.04532	0.127	-0.127
-0.21822	0.03849	-0.80841	0.02511	-0.00879	0.04047	-0.04047	0.11972	-0.11972
-0.20122	0.03437	-1.62269	0.02335	-0.03072	0.03453	-0.03453	0.09608	-0.09608
-0.18322	0.03782	-2.63564	0.02473	-0.05082	0.03368	-0.03368	0.09781	-0.09781
-0.16622	0.02678	-2.42929	0.02039	-0.0357	0.03308	-0.03308	0.09763	-0.09763
-0.14922	0.02654	-2.7755	0.02431	-0.0335	0.03945	-0.03945	0.09702	-0.09702
-0.13122	0.02612	-4.77603	0.02408	-0.03579	0.04117	-0.04117	0.11354	-0.11354
-0.11422	0.02746	-4.08345	0.02271	-0.03599	0.04132	-0.04132	0.13005	-0.13005
-0.09622	0.04061	-2.53623	0.02857	-0.04022	0.04202	-0.04202	0.14422	-0.14422
-0.07922	0.03905	-1.80899	0.02826	-0.03535	0.05511	-0.05511	0.19497	-0.19497
-0.06222	0.03618	-1.49299	0.02789	-0.03176	0.09078	-0.09078	0.37261	-0.37261
-0.04422	0.03823	-1.2288	0.03003	-0.02993	0.05345	-0.05345	0.25183	-0.25183
-0.02722	0.04057	-1.00382	0.03253	-0.03164	0.02615	-0.02615	0.14964	-0.14963
-0.00922	0.04441	-1.22347	0.03493	-0.03438	0.01876	-0.01876	0.08547	-0.08547
0.00778	0.04761	-1.95184	0.0382	-0.05468	0.01793	-0.01793	0.08232	-0.08232
0.02478	0.051	-1.49918	0.04588	-0.04817	0.02125	-0.02125	0.09881	-0.09881
0.04278	0.07821	-1.40017	0.0633	-0.04648	0.02808	-0.02808	0.12642	-0.12642
0.05978	0.05047	-1.31206	0.06178	-0.04527	0.03309	-0.03309	0.15504	-0.15504
0.07778	0.04558	-1.15966	0.07089	-0.04372	0.03826	-0.03826	0.1853	-0.1853
0.09478	0.03823	-1.11415	0.05929	-0.04149	0.07414	-0.07414	0.29766	-0.29766
0.11178	0.03214	-1.10631	0.05101	-0.04022	0.03155	-0.03155	0.21277	-0.21277
0.12978	0.0467	-1.28815	0.05662	-0.04727	0.05114	-0.05114	0.30507	-0.30507
0.14678	0.04737	-1.21767	0.05606	-0.04341	0.04871	-0.04872	0.30855	-0.30855
0.16478	0.03929	-1.32458	0.05009	-0.03981	0.03649	-0.03649	0.2711	-0.2711
0.18178	0.03179	-1.5971	0.0443	-0.03821	0.03009	-0.03009	0.2006	-0.2006
0.19878	0.02733	-1.54898	0.04095	-0.03566	0.02938	-0.02938	0.19784	-0.19784
0.21678	0.02489	-1.221	0.03961	-0.03299	0.03125	-0.03125	0.2286	-0.2286
0.23378	0.02362	-1.06791	0.03937	-0.03432	0.06009	-0.06009	0.41234	-0.41234
0.25178	0.04003	-0.96032	0.05574	-0.04036	0.06006	-0.06006	0.44687	-0.44687
0.26878	0.04587	-0.87903	0.07234	-0.05138	0.05077	-0.05077	0.43601	-0.43601
0.28578	0.04879	-0.86185	0.08876	-0.06357	0.04944	-0.04944	0.44349	-0.44349
0.30378	0.04061	-0.87562	0.07798	-0.08311	0.04786	-0.04786	0.44727	-0.44727
0.32078	0.03095	-0.89322	0.06904	-0.1019	0.04894	-0.04894	0.46976	-0.46976
0.33878	0.02923	-0.88058	0.06973	-0.11755	0.05014	-0.05014	0.4917	-0.4917
0.35578	0.03143	-0.9522	0.07187	-0.13192	0.08161	-0.08161	0.69989	-0.69989
0.37378	0.03359	-0.98083	0.07448	-0.11681	0.09848	-0.09848	0.81814	-0.81814
0.39078	0.03519	-0.70256	0.08107	-0.07954	0.09728	-0.09728	0.84589	-0.84589
0.40778	0.04634	-0.99548	0.09949	-0.15535	0.0958	-0.0958	0.86653	-0.86653
0.42578	0.04761	-0.71439	0.10621	-0.10934	0.08803	-0.08803	0.85164	-0.85164
0.44278	0.05503	-0.5454	0.1271	-0.044	0.07583	-0.07583	0.82373	-0.82373
0.46078	0.1023	-0.5173	0.21341	-0.04251	0.09651	-0.09651	0.99744	-0.99744
0.47778	0.06068	-0.57074	0.08623	-0.04561	0.14458	-0.14458	1.76499	-1.76499
0.49478	0.05415	-0.51418	0.08925	-0.04227	0.0886	-0.0886	0.96647	-0.96647
0.51278	0.05414	-0.96847	0.08756	-0.08901	0.05739	-0.05739	0.5612	-0.5612
0.52978	0.0537	-0.58778	0.08693	-0.06255	0.04326	-0.04326	0.3672	-0.36719
0.54778	0.05352	-0.56993	0.08761	-0.09109	0.04383	-0.04383	0.40171	-0.40171
0.56478	0.05338	-0.50817	0.08859	-0.08579	0.04889	-0.04889	0.52761	-0.52761
0.58178	0.06615	-0.416	0.09993	-0.07886	0.03884	-0.03884	0.45258	-0.45258
0.59978	0.0498	-0.40286	0.07952	-0.07703	0.02896	-0.02896	0.32361	-0.32361
0.61678	0.04377	-0.34711	0.08033	-0.07162	0.03496	-0.03496	0.4028	-0.4028
0.63478	0.03273	-0.2857	0.06597	-0.05365	0.05716	-0.05716	0.73467	-0.73467
0.65178	0.02666	-0.35941	0.05149	-0.08178	0.09384	-0.09384	1.2942	-1.2942
0.66878	0.03828	-0.31092	0.0622	-0.07604	0.12515	-0.12515	1.80838	-1.80838
0.68678	0.04957	-0.308	0.08548	-0.07883	0.15491	-0.15491	2.29564	-2.29574
0.70378	0.05027	-0.31089	0.09188	-0.08352	0.11943	-0.11943	1.7376	-1.7376
0.72178	0.06048	-0.46081	0.10485	-0.13625	0.25761	-0.25746	5.42845	-5.42585
0.73878	0.11118	-0.46198	0.20867	-0.14467	0.10122	-0.10122	1.42503	-1.42503
0.75578	0.07707	-0.48377	0.1622	-0.1515	0.07699	-0.07699	0.92673	-0.92673
0.77378	0.0629	-0.45224	0.15771	-0.10641	0.06962	-0.06962	0.82203	-0.82203
0.79078	0.02365	-0.35001	0.07145	-0.09156	0.05966	-0.05966	0.75639	-0.75639
0.80878	0.01546	-0.26891	0.04543	-0.05936	0.07199	-0.07199	0.87119	-0.87119
0.82578	0.01797	-0.25644	0.0535	-0.05401	0.06863	-0.06863	0.82768	-0.82768
0.84278	0.02052	-0.27089	0.06171	-0.05968	0.05262	-0.05262	0.63401	-0.63401
0.86078	0.02311	-0.28412	0.07009	-0.06557	0.0528	-0.05281	0.62471	-0.62471
0.87778	0.02858	-0.24272	0.08933	-0.06876	0.05677	-0.05677	0.7021	-0.7022
0.89578	0.0317	-0.24503	0.10341	-0.07181	0.05924	-0.05924	0.75988	-0.75978
0.91278	0.03495	-0.24775	0.11821	-0.07485	0.06908	-0.06907	0.91763	-0.91763
0.92978	0.05283	-0.21757	0.17579	-0.07402	0.15486	-0.15485	2.354	-2.3539
0.94778	0.02846	-0.31026	0.12179	-0.09841	0.10365	-0.10365	1.47059	-1.47059
0.96478	0.11823	-0.41195	0.2038	-0.1069	0.09069	-0.09069	1.26963	-1.26963
0.98278	0.0531	-0.49811	0.15915	-0.11788	0.06967	-0.06967	0.95948	-0.95948
0.99978	0.0463	-0.39583	0.15978	-0.11511	0.04339	-0.04339	0.61279	-0.61279
1.01678	0.03798	-0.38816	0.12689	-0.10664	0.03167	-0.03167	0.43591	-0.43591
1.03478	0.03071	-0.3935	0.10033	-0.10643	0.0292	-0.0292	0.38246	-0.38245
1.05178	0.03958	-0.38572	0.13947	-0.10282	0.02794	-0.02794	0.36886	-0.36886
1.06978	0.04249	-0.366	0.14469	-0.09057	0.02595	-0.02595	0.32228	-0.32228
1.08678	0.0441	-0.32848	0.15991	-0.08714	0.02614	-0.02614	0.31986	-0.31986
1.10378	0.03816	-0.31472	0.16061	-0.08357	0.02641	-0.02641	0.318	-0.318
1.12178	0.03548	-0.31067	0.16132	-0.0843	0.02676	-0.02676	0.31684	-0.31683
1.13878	0.03639	-0.36496	0.16627	-0.12088	0.03218	-0.03218	0.38235	-0.38235
1.15678	0.03746	-0.37951	0.17146	-0.1473	0.03342	-0.03342	0.38328	-0.38328
1.17378	0.03842	-0.37679	0.17622	-0.16006	0.04157	-0.04157	0.45693	-0.45693
1.19078	0.04215	-0.37212	0.19502	-0.17352	0.05049	-0.05049	0.55609	-0.55609
1.20878	0.05258	-0.40693	0.22265	-0.23522	0.04371	-0.04371	0.48966	-0.48956
1.22578	0.07764	-0.35011	0.27711	-0.21285	0.03538	-0.03538	0.37285	-0.37285
1.24378	0.07675	-0.52659	0.28288	-0.21893	0.03617	-0.03617	0.37351	-0.37341
1.26078	0.07586	-0.42139	0.28871	-0.22196	0.03267	-0.03267	0.32283	-0.32283
1.27778	0.07501	-0.36729	0.29447	-0.21209	0.03148	-0.03148	0.29911	-0.29911
1.29578	0.08229	-0.32396	0.29914	-0.19794	0.02839	-0.02839	0.25416	-0.25416
1.31278	0.07999	-0.40597	0.30644	-0.21785	0.02525	-0.02525	0.20427	-0.20427
1.33078	0.09022	-0.56295	0.37911	-0.32914	0.02625	-0.02625	0.19887	-0.19887
1.34778	0.12608	-1.20108	0.5666	-0.42962	0.0274	-0.0274	0.19796	-0.19796
1.36478	0.16984	-0.36715	0.7377	-0.25044	0.02881	-0.02881	0.20069	-0.20069
1.38278	0.14518	-0.31099	0.62053	-0.26034	0.0306	-0.0306	0.20973	-0.20972
1.39978	0.06551	-0.3152	0.31054	-0.2817	0.03242	-0.03242	0.21999	-0.21999
1.41778	0.0658	-0.33965	0.35392	-0.33	0.03992	-0.03993	0.25517	-0.25517
1.43478	0.06672	-0.36445	0.40264	-0.37756	0.03271	-0.03271	0.22659	-0.22659
1.45278	0.06567	-0.38974	0.43287	-0.42444	0.03309	-0.03309	0.23192	-0.23192
1.46978	0.03748	-0.34361	0.27815	-0.4197	0.03662	-0.03662	0.24649	-0.24648
1.48678	0.03032	-0.2582	0.21299	-0.22521	0.03853	-0.03853	0.25109	-0.25109
1.50478	0.03433	-0.31457	0.25841	-0.27562	0.03835	-0.03835	0.25096	-0.25096
1.52178	0.05246	-0.37333	0.29786	-0.30659	0.03755	-0.03755	0.25449	-0.25449
1.53978	0.06985	-0.44205	0.36188	-0.34992	0.03947	-0.03947	0.36039	-0.3604
1.55678	0.09159	-0.50961	0.51433	-0.37902	0.03724	-0.03724	0.24712	-0.24712
1.57378	0.10759	-0.50199	0.62699	-0.41965	0.03265	-0.03265	0.23265	-0.23265
1.59178	0.10695	-0.47492	0.63675	-0.44156	0.02985	-0.02985	0.21365	-0.21365
1.60878	0.10092	-0.48723	0.57473	-0.4846	0.03045	-0.03045	0.20533	-0.20533
1.62678	0.1057	-0.40376	0.62321	-0.41507	0.02976	-0.02976	0.1954	-0.19539
1.64378	0.1112	-0.36905	0.67322	-0.52033	0.02786	-0.02786	0.17599	-0.17599
1.66078	0.11173	-0.39109	0.67161	-0.54471	0.02583	-0.02583	0.15448	-0.15448
1.67878	0.11738	-0.40559	0.74625	-0.52435	0.02371	-0.02371	0.13307	-0.13307
1.69578	0.09611	-0.42834	0.68744	-0.54017	0.02107	-0.02107	0.10971	-0.10971
1.71378	0.09329	-0.45164	0.66856	-0.55989	0.01791	-0.01791	0.09166	-0.09166
1.73078	0.09193	-0.53299	0.67663	-0.65073	0.01447	-0.01447	0.06468	-0.06468
1.74778	0.09125	-0.41185	0.68988	-0.46392	0.01765	-0.01765	0.06552	-0.06551
1.76578	0.09362	-0.52628	0.7213	-0.60039	0.02155	-0.02155	0.06868	-0.06868
1.78278	0.10352	-0.61056	0.80287	-0.71738	0.02463	-0.02463	0.08852	-0.08852
1.80078	0.12429	-0.7021	1.00312	-0.87204	0.02504	-0.02504	0.08712	-0.08712
1.81778	0.14367	-0.84771	1.21414	-1.14398	0.027	-0.027	0.0843	-0.0843
1.83478	0.1147	-0.99503	0.92526	-1.44504	0.02927	-0.02927	0.08408	-0.08408
1.85278	0.10014	-0.8684	0.8084	-1.49628	0.02723	-0.02723	0.07953	-0.07953
1.86978	0.09464	-1.56475	0.78141	-2.74143	0.02587	-0.02587	0.07581	-0.07581
1.88778	0.11115	-0.48928	0.90186	-0.94862	0.02639	-0.02639	0.08813	-0.08813
1.90478	0.18513	-0.45891	1.48305	-0.88584	0.02527	-0.02527	0.08598	-0.08598
1.92178	0.1686	-0.47798	1.3218	-0.93729	0.02204	-0.02204	0.07466	-0.07464
1.93978	0.24982	-0.53349	2.11287	-1.0418	0.02121	-0.02121	0.07355	-0.07355
1.95678	0.25416	-0.54036	2.14439	-0.99356	0.01974	-0.01974	0.06982	-0.06982
1.97478	0.13135	-0.526	1.04915	-0.88999	0.01825	-0.01825	0.06624	-0.06624
1.99178	0.07037	-0.47012	0.48369	-0.79816	0.0168	-0.0168	0.0628	-0.0628
2.00878	0.06749	-0.43297	0.4531	-0.71928	0.01583	-0.01583	0.06005	-0.06005
2.02678	0.11619	-0.5864	0.88381	-1.14482	0.01688	-0.01688	0.06124	-0.06124
2.04378	0.10648	-0.55829	0.81116	-0.95872	0.02291	-0.02291	0.07548	-0.07548
2.06178	0.09137	-0.67168	0.72073	-1.3329	0.02074	-0.02074	0.07447	-0.07447
2.07878	0.13891	-0.56443	1.24403	-0.89076	0.01888	-0.01888	0.07511	-0.07511
2.09578	0.08384	-0.4955	0.64659	-0.67644	0.01923	-0.01923	0.0812	-0.0812
2.11378	0.08849	-0.25655	0.67981	-0.64974	0.01952	-0.01952	0.07256	-0.07256
2.13078	0.09412	-0.28432	0.72048	-0.67513	0.01927	-0.01927	0.06542	-0.06542
2.14878	0.26067	-0.30212	1.543	-0.70458	0.01981	-0.01981	0.05825	-0.05825
2.16578	0.11922	-0.33749	0.98632	-0.83502	0.01866	-0.01866	0.04892	-0.04892
2.18278	0.09605	-0.33624	0.75876	-0.70384	0.0189	-0.0189	0.05234	-0.05234
2.20078	0.08515	-0.33964	0.65109	-0.60917	0.01899	-0.01899	0.05427	-0.05427
2.21778	0.07764	-0.34967	0.56245	-0.55623	0.01711	-0.01711	0.04413	-0.04413
2.23578	0.07186	-0.38977	0.48635	-0.53337	0.01536	-0.01536	0.03658	-0.03658
2.25278	0.06634	-0.3982	0.41442	-0.49204	0.01525	-0.01525	0.03194	-0.03194
2.26978	0.06149	-0.40904	0.35281	-0.45643	0.01618	-0.01618	0.03061	-0.03061
2.28778	0.06051	-0.41951	0.33126	-0.42275	0.02047	-0.02047	0.03338	-0.03337
2.30478	0.0625	-0.40044	0.3323	-0.42205	0.03284	-0.03284	0.03378	-0.03378
2.32278	0.06972	-0.46501	0.36682	-0.48923	0.02369	-0.02369	0.03026	-0.03026
2.33978	0.06134	-0.28633	0.33007	-0.37903	0.02346	-0.02346	0.02841	-0.02841
2.35678	0.06181	-0.1861	0.3297	-0.31449	0.02324	-0.02324	0.0266	-0.0266
2.37478	0.08409	-0.21323	0.41768	-0.35173	0.02296	-0.02296	0.02482	-0.02482
2.39178	0.08744	-0.23122	0.46114	-0.40306	0.02262	-0.02262	0.0231	-0.0231
2.40978	0.0877	-0.2842	0.49004	-0.54715	0.02313	-0.02313	0.02225	-0.02225
2.42678	0.08953	-0.31895	0.53114	-0.62318	0.02277	-0.02277	0.0197	-0.0197
2.44378	0.09312	-0.38931	0.5891	-0.78059	0.02383	-0.02383	0.01941	-0.01941
2.46178	0.0965	-0.4268	0.64754	-0.77865	0.02954	-0.02954	0.02732	-0.02732
2.47878	0.09574	-0.40906	0.63492	-0.68174	0.03477	-0.03477	0.03617	-0.03617
2.49678	0.08542	-0.45077	0.61015	-0.67222	0.03865	-0.03865	0.04414	-0.04414
2.51378	0.08188	-0.4093	0.56833	-0.63031	0.0419	-0.0419	0.05016	-0.05016
2.53078	0.08005	-0.37611	0.53667	-0.55203	0.03171	-0.03171	0.04297	-0.04297
2.54878	0.07572	-0.34687	0.5004	-0.47111	0.03185	-0.03185	0.04081	-0.0408
2.56578	0.07015	-0.31521	0.44966	-0.41436	0.03315	-0.03315	0.04289	-0.04289
2.58378	0.06287	-0.84832	0.37824	-0.58257	0.02655	-0.02656	0.03203	-0.03203
2.60078	0.05279	-0.5675	0.29132	-0.38005	0.02986	-0.02986	0.03163	-0.03163
2.61878	0.04289	-0.3849	0.22767	-0.26816	0.03547	-0.03548	0.03262	-0.03264
2.63578	0.03066	-0.21887	0.14793	-0.16053	0.04057	-0.04058	0.03187	-0.03188
2.65278	0.03375	-0.12919	0.1331	-0.12466	0.03877	-0.03879	0.02926	-0.02927
2.67078	0.03591	-0.11731	0.11908	-0.10863	0.03564	-0.0358	0.0263	-0.0255
2.68778	0.03872	-0.10181	0.10879	-0.09258	0.03289	-0.0329	0.02308	-0.02308
2.70578	0.03777	-0.08713	0.09759	-0.07715	0.03155	-0.03154	0.02727	-0.02728
2.72278	0.04354	-0.10194	0.09956	-0.09379	0.03032	-0.03033	0.02661	-0.02661
2.73978	0.04226	-0.10984	0.08942	-0.08306	0.02959	-0.02958	0.02597	-0.02597
2.75778	0.04029	-0.24303	0.07988	-0.11971	0.02934	-0.02933	0.02538	-0.02538
2.77478	0.05014	-0.23066	0.13213	-0.1117	0.02823	-0.02825	0.024	-0.02401
2.79278	0.05161	-0.22238	0.14659	-0.10559	0.02471	-0.02466	0.02145	-0.0214
2.80978	0.04911	-0.24856	0.14309	-0.13135	0.02907	-0.02913	0.02834	-0.02848
2.82678	0.04667	-0.26197	0.13925	-0.12994	0.03541	-0.03535	0.03262	-0.03255
2.84478	0.04209	-0.2763	0.12603	-0.12828	0.0315	-0.03145	0.02848	-0.02843
2.86178	0.04651	-0.29118	0.15963	-0.1261	0.03569	-0.0357	0.03001	-0.03002
2.87978	0.04398	-0.2962	0.15524	-0.12162	0.02352	-0.02351	0.02616	-0.02616
2.89678	0.04058	-0.37802	0.14787	-0.13135	0.02432	-0.02433	0.03171	-0.03173
2.91378	0.03717	-0.54405	0.14063	-0.1519	0.02111	-0.02113	0.02758	-0.02762
2.93178	0.03379	-0.78873	0.13353	-0.22001	0.01773	-0.01774	0.02575	-0.02578
2.94878	0.03315	-1.08653	0.13181	-0.21866	0.01528	-0.01529	0.02697	-0.027
2.96678	0.04255	-0.31164	0.15058	-0.14983	0.0189	-0.0189	0.02638	-0.02643
2.98378	0.03825	-0.55912	0.14179	-0.18991	0.02226	-0.02226	0.02544	-0.02546
3.00078	0.03364	-0.3155	0.13127	-0.13856	0.0426	-0.0426	0.05498	-0.05498
3.01878	0.03335	-0.36108	0.13654	-0.14782	0.05056	-0.05051	0.04663	-0.04663
3.03578	0.03466	-0.45385	0.14548	-0.14909	0.04258	-0.04255	0.05028	-0.05026
3.05378	0.0359	-0.34205	0.13089	-0.12965	0.03108	-0.03111	0.03655	-0.03655
3.07078	0.0338	-0.25388	0.10894	-0.09646	0.03093	-0.03099	0.03412	-0.03413
3.08778	0.03008	-0.17934	0.08843	-0.06791	0.03298	-0.03306	0.03177	-0.03177
3.10578	0.02828	-0.18319	0.07832	-0.07301	0.04179	-0.04185	0.0308	-0.03082
3.12278	0.02864	-0.18768	0.08492	-0.0759	0.04188	-0.04193	0.03196	-0.03198
3.14078	0.0291	-0.1922	0.08942	-0.07873	0.04721	-0.04723	0.03508	-0.03509
3.15778	0.02783	-0.19674	0.08207	-0.08149	0.035	-0.03499	0.02646	-0.02645
3.17478	0.02542	-0.1945	0.06874	-0.07721	0.03159	-0.03155	0.02359	-0.02357
3.19278	0.02295	-0.19404	0.05653	-0.06969	0.0281	-0.02802	0.02367	-0.02364
3.20978	0.02378	-0.21886	0.05461	-0.06714	0.05828	-0.05817	0.04611	-0.04607
3.22778	0.02524	-0.24276	0.05375	-0.06836	0.02441	-0.02441	0.01987	-0.01987
3.24478	0.03968	-0.26285	0.0582	-0.0703	0.02477	-0.0248	0.04634	-0.04661
3.26178	0.03614	-0.20572	0.054	-0.05458	0.02545	-0.02546	0.04554	-0.04571
3.27978	0.0353	-0.17127	0.05055	-0.05132	0.07398	-0.07396	0.05714	-0.05714
3.29678	0.03445	-0.13853	0.04717	-0.04639	0.03559	-0.03558	0.04076	-0.04056
3.31478	0.03357	-0.1431	0.04388	-0.04505	0.01556	-0.01554	0.02731	-0.02718
3.33178	0.03264	-0.14799	0.04063	-0.04383	0.01609	-0.01606	0.02326	-0.02322
3.34878	0.0306	-0.15318	0.03514	-0.04274	0.01515	-0.01521	0.02424	-0.02432
3.36678	0.02909	-0.1576	0.03231	-0.04223	0.02903	-0.02903	0.04431	-0.04434
3.38378	0.02675	-0.183	0.03429	-0.05295	0.0253	-0.02532	0.05246	-0.05252
3.40178	0.0253	-0.24339	0.03801	-0.06886	0.0227	-0.0227	0.04564	-0.04561
3.41878	0.03185	-0.38565	0.05035	-0.0805	0.0226	-0.02256	0.03893	-0.03877
3.43578	0.04297	-0.1312	0.06403	-0.06546	0.02247	-0.02244	0.02738	-0.02737
3.45378	0.05247	-0.14281	0.07556	-0.0613	0.04179	-0.04162	0.028	-0.02794
3.47078	0.05794	-0.1705	0.07174	-0.05264	0.03305	-0.03312	0.03197	-0.03201
3.48878	0.05305	-0.4035	0.06366	-0.07994	0.03122	-0.03125	0.03298	-0.03303
3.50578	0.04566	-0.2832	0.05883	-0.0649	0.02916	-0.02918	0.03339	-0.03343
3.52278	0.04743	-0.27917	0.05971	-0.06522	0.02632	-0.02633	0.03291	-0.03296
3.54078	0.03701	-0.23606	0.04349	-0.05737	0.02195	-0.02196	0.02799	-0.02803
3.55778	0.03598	-0.16588	0.03906	-0.04396	0.02061	-0.02063	0.02795	-0.02799
3.57578	0.04327	-0.15725	0.03943	-0.04257	0.02378	-0.02378	0.03142	-0.03146
3.59278	0.05038	-0.14659	0.04125	-0.03845	0.02355	-0.02353	0.03741	-0.03745
3.60978	0.05223	-0.13864	0.04105	-0.03586	0.02872	-0.02869	0.04231	-0.04236
3.62778	0.04783	-0.19967	0.03677	-0.04469	0.0277	-0.0278	0.04984	-0.05033
3.64478	0.04374	-0.17806	0.03274	-0.03907	0.02402	-0.02405	0.06028	-0.06012
3.66278	0.03968	-0.15738	0.02891	-0.03398	0.02236	-0.02234	0.05205	-0.052
3.67978	0.0404	-0.13753	0.03124	-0.0292	0.01897	-0.01898	0.04297	-0.04295
3.69678	0.03996	-0.16883	0.03203	-0.04	0.01714	-0.01713	0.04419	-0.04416
3.71478	0.04007	-0.14829	0.03212	-0.03756	0.01295	-0.01295	0.04158	-0.04161
3.73178	0.03954	-0.12377	0.03058	-0.03311	0.01311	-0.0131	0.0438	-0.04385
3.74978	0.03358	-0.08974	0.0258	-0.02768	0.013	-0.01256	0.04161	-0.03392
3.76678	0.03163	-0.07373	0.02411	-0.02141	0.01348	-0.01347	0.03218	-0.03217
3.78478	0.03557	-0.12021	0.02725	-0.02635	0.01663	-0.01664	0.03619	-0.03622
3.80178	0.04285	-0.1347	0.03215	-0.0269	0.02049	-0.02051	0.04296	-0.04304
3.81878	0.0447	-0.17372	0.02728	-0.03247	0.02808	-0.02811	0.05027	-0.05031
3.83678	0.04641	-0.17381	0.03557	-0.03826	0.02225	-0.02226	0.03445	-0.03449
3.85378	0.03171	-0.13228	0.0284	-0.04155	0.01876	-0.01875	0.02974	-0.02977
3.87178	0.03127	-0.11854	0.03291	-0.04154	0.02531	-0.02536	0.04368	-0.04378
3.88878	0.03334	-0.1075	0.0374	-0.03888	0.02197	-0.02195	0.03593	-0.03593
3.90578	0.03294	-0.0986	0.03555	-0.03612	0.02157	-0.02157	0.03325	-0.03321
3.92378	0.02809	-0.09387	0.03185	-0.03387	0.02053	-0.02053	0.02967	-0.0297
3.94078	0.02927	-0.09663	0.03629	-0.03369	0.02042	-0.02042	0.02894	-0.02893
3.95878	0.03122	-0.11177	0.02897	-0.03853	0.02025	-0.02025	0.02835	-0.02834
3.97578	0.04908	-0.15224	0.05836	-0.04756	0.01991	-0.0199	0.02855	-0.02853
3.99278	0.04962	-0.14687	0.05403	-0.04757	0.0232	-0.0232	0.03997	-0.04003
4.01078	0.05235	-0.11622	0.05173	-0.04446	0.03517	-0.03388	0.16357	-0.15045
4.02778	0.04519	-0.1679	0.04619	-0.07521	0.01468	-0.01467	0.04628	-0.04644
4.04578	0.04222	-0.0836	0.04113	-0.03985	0.01648	-0.01649	0.06496	-0.0651
4.06278	0.04353	-0.0718	0.04217	-0.03304	0.01852	-0.0185	0.05157	-0.05137
4.07978	0.05227	-0.07599	0.0456	-0.03356	0.02209	-0.02207	0.04031	-0.04025
4.09778	0.05648	-0.24276	0.04646	-0.05786	0.01202	-0.01202	0.0313	-0.03128
4.11478	0.06109	-0.16537	0.03677	-0.03166	0.01399	-0.01397	0.03637	-0.03636
4.13278	0.06409	-0.16714	0.03319	-0.03306	0.03286	-0.03288	0.05886	-0.05888
4.14978	0.04726	-0.16444	0.02835	-0.03353	0.02269	-0.02271	0.05064	-0.05071
4.16678	0.04058	-0.15617	0.02785	-0.03133	0.04099	-0.04096	0.07106	-0.07109
4.18478	0.0342	-0.07264	0.02649	-0.02166	0.01879	-0.01879	0.04754	-0.04768
4.20178	0.07326	-0.08383	0.04687	-0.02725	0.01891	-0.01886	0.05021	-0.05019
4.21978	0.05459	-0.13352	0.0392	-0.04267	0.01723	-0.01724	0.05473	-0.0547
4.23678	0.0368	-0.16382	0.04397	-0.05436	0.01572	-0.01566	0.04552	-0.04535
4.25378	0.03211	-0.10657	0.03713	-0.04988	0.0168	-0.0167	0.04482	-0.04463
4.27178	0.08449	-0.129	0.06986	-0.05791	0.0175	-0.01745	0.04581	-0.04573
4.28878	0.07397	-0.12337	0.06047	-0.05087	0.01573	-0.01613	0.0449	-0.04556
4.30678	0.04111	-0.11244	0.04501	-0.05115	0.01574	-0.0157	0.04464	-0.04407
4.32378	0.03315	-0.12829	0.04017	-0.04433	0.01592	-0.01601	0.04433	-0.04395
4.34078	0.02389	-0.06523	0.0326	-0.02867	0.01722	-0.01648	0.04604	-0.0442
4.35878	0.02143	-0.06575	0.02437	-0.02932	0.01523	-0.01547	0.03967	-0.04105
4.37578	0.05137	-0.09337	0.04498	-0.04445	0.01384	-0.01394	0.0336	-0.03414
4.39378	0.0369	-0.13049	0.05187	-0.05871	0.01323	-0.01329	0.02955	-0.0297
4.41078	0.03151	-0.12167	0.05076	-0.05831	0.01382	-0.01387	0.02678	-0.02684
4.42778	0.03341	-0.09596	0.04909	-0.04357	0.01045	-0.01038	0.02313	-0.02323
4.44578	0.04094	-0.08849	0.04591	-0.02619	0.01069	-0.01007	0.02436	-0.02332
4.46278	0.04307	-0.09668	0.03643	-0.03012	0.01243	-0.01185	0.02659	-0.02515
4.48078	0.04261	-0.10229	0.03249	-0.03247	0.01357	-0.01419	0.02732	-0.02676
4.49778	0.04418	-0.10748	0.03694	-0.03369	0.0114	-0.01157	0.02726	-0.02747
4.51478	0.04416	-0.11775	0.0381	-0.03628	0.01092	-0.0111	0.02958	-0.0298
4.53278	0.04267	-0.10877	0.03844	-0.03196	0.01124	-0.01138	0.043	-0.04272
4.54978	0.03571	-0.11144	0.03132	-0.03306	0.01102	-0.01124	0.03862	-0.03821
4.56778	0.03436	-0.1007	0.03139	-0.03299	0.0128	-0.01326	0.04082	-0.04114
4.58478	0.03249	-0.09004	0.03101	-0.03386	0.01578	-0.01596	0.04743	-0.0473
4.60178	0.03468	-0.09436	0.03444	-0.03776	0.01022	-0.01046	0.02651	-0.02685
4.61978	0.03627	-0.09541	0.03781	-0.06446	0.0164	-0.01589	0.05435	-0.04972
4.63678	0.03888	-0.09233	0.04882	-0.05316	0.01352	-0.01337	0.02842	-0.02946
4.65478	0.03473	-0.11643	0.04666	-0.06801	0.01578	-0.01566	0.03551	-0.03635
4.67178	0.03681	-0.1083	0.06312	-0.05605	0.01602	-0.01568	0.03757	-0.03738
4.68878	0.0329	-0.06742	0.0621	-0.04553	0.02092	-0.0204	0.03484	-0.03373
4.70678	0.02696	-0.06788	0.04324	-0.04689	0.025	-0.02439	0.04056	-0.03937
4.72378	0.02756	-0.07117	0.04678	-0.04959	0.01947	-0.02006	0.0396	-0.04024
4.74178	0.02269	-0.05998	0.04356	-0.04675	0.01116	-0.0116	0.03752	-0.03898
4.75878	0.02262	-0.06059	0.04505	-0.04747	0.01064	-0.01353	0.02698	-0.02712
4.77578	0.02367	-0.05863	0.04709	-0.04358	0.03757	-0.0376	0.06473	-0.06141
4.79378	0.02506	-0.05898	0.04732	-0.03253	0.03453	-0.02924	0.04222	-0.03972
4.81078	0.02475	-0.06356	0.03352	-0.0343	0.01416	-0.01845	0.02807	-0.03537
4.82878	0.02901	-0.0671	0.03996	-0.03063	0.0225	-0.0175	0.03117	-0.02581
4.84578	0.034	-0.07942	0.04215	-0.03343	0.0266	-0.02519	0.03262	-0.03046
4.86278	0.0464	-0.09722	0.04589	-0.03884	0.03625	-0.03671	0.04208	-0.04279
4.88078	0.04006	-0.09583	0.04086	-0.03776	0.02809	-0.0268	0.04091	-0.03986
4.89778	0.03191	-0.13864	0.03484	-0.05581	0.02801	-0.02799	0.04568	-0.04691
4.91578	0.02842	-0.09144	0.03461	-0.04082	0.02741	-0.02779	0.04738	-0.04995
4.93278	0.03094	-0.08408	0.04116	-0.03923	0.02192	-0.02185	0.04474	-0.04645
4.95078	0.03057	-0.07455	0.03604	-0.03563	0.02606	-0.02723	0.05043	-0.05492
4.96778	0.02804	-0.0685	0.03298	-0.03194	0.01892	-0.01941	0.04427	-0.04495
4.98478	0.0265	-0.06478	0.02962	-0.03053	0.01825	-0.01836	0.03979	-0.03876
5.00278	0.02565	-0.06295	0.02925	-0.03036	0.01999	-0.01977	0.04184	-0.04073
5.01978	0.02524	-0.06484	0.02994	-0.03188	0.01984	-0.01988	0.04227	-0.04052
5.03778	0.02344	-0.05065	0.02872	-0.02848	0.0201	-0.01987	0.04789	-0.04458
5.05478	0.02312	-0.05869	0.02833	-0.05306	0.01968	-0.01937	0.04542	-0.04453
5.07178	0.03373	-0.06214	0.05225	-0.06351	0.0207	-0.01905	0.04161	-0.0421
5.08978	0.02592	-0.06181	0.0487	-0.07453	0.02284	-0.0229	0.04867	-0.04984
5.10678	0.02453	-0.06283	0.06173	-0.06273	0.01779	-0.01853	0.04489	-0.04734
5.12478	0.03668	-0.13918	0.1279	-0.05362	0.01661	-0.0163	0.04513	-0.04092
5.14178	0.03504	-0.05608	0.0349	-0.03745	0.0158	-0.01426	0.04287	-0.03695
5.15878	0.02476	-0.05207	0.03125	-0.03839	0.01544	-0.01453	0.04124	-0.03627
5.17678	0.02514	-0.05666	0.03456	-0.04004	0.0159	-0.01551	0.03883	-0.03402
5.19378	0.05221	-0.09	0.05421	-0.04935	0.01507	-0.01315	0.03547	-0.02804
5.21178	0.03333	-0.09363	0.05047	-0.05392	0.0174	-0.01421	0.03785	-0.02888
5.22878	0.02984	-0.07355	0.052	-0.04612	0.01678	-0.01445	0.0356	-0.02905
5.24578	0.02295	-0.06473	0.03742	-0.04389	0.01835	-0.0172	0.03828	-0.03415
5.26378	0.02184	-0.04116	0.03497	-0.03594	0.01899	-0.01984	0.03967	-0.03918
5.28078	0.02012	-0.03884	0.03628	-0.03545	0.01746	-0.02495	0.03832	-0.04926
5.29878	0.01851	-0.03891	0.03889	-0.03518	0.01397	-0.01722	0.03882	-0.04435
5.31578	0.02197	-0.04058	0.05064	-0.03423	0.01615	-0.01531	0.04746	-0.04663
5.33278	0.02364	-0.05149	0.05172	-0.04054	0.02158	-0.01948	0.05517	-0.05923
5.35078	0.02356	-0.0624	0.05198	-0.04393	0.01655	-0.01241	0.0433	-0.03602
5.36778	0.01916	-0.05617	0.04368	-0.0416	0.01519	-0.01258	0.03523	-0.03215
5.38578	0.01914	-0.05547	0.0424	-0.04098	0.01081	-0.00962	0.02431	-0.02521
5.40278	0.0192	-0.05234	0.04112	-0.03914	0.01153	-0.00864	0.02374	-0.0228
5.41978	0.01951	-0.05081	0.0406	-0.03695	0.01297	-0.00808	0.02508	-0.02272
5.43778	0.01954	-0.05545	0.03882	-0.03878	0.00892	-0.0089	0.02032	-0.0278
5.45478	0.0207	-0.06322	0.03842	-0.04244	0.00695	-0.00857	0.01577	-0.02565
5.47278	0.02084	-0.05014	0.03819	-0.03161	0.00783	-0.00904	0.01997	-0.02445
5.48978	0.01861	-0.04636	0.03177	-0.02903	0.00947	-0.00958	0.02114	-0.02518
5.50678	0.0183	-0.04301	0.02839	-0.02669	0.01158	-0.01004	0.02314	-0.02416
5.52478	0.02109	-0.04073	0.03006	-0.02529	0.01453	-0.01102	0.02541	-0.02212
5.54178	0.02337	-0.04284	0.03282	-0.02673	0.01213	-0.01178	0.02231	-0.02149
5.55978	0.01944	-0.04355	0.02912	-0.03041	0.01216	-0.01251	0.02156	-0.02048
5.57678	0.01754	-0.05355	0.02706	-0.03838	0.01235	-0.01413	0.02127	-0.02081
5.59378	0.01584	-0.03721	0.02505	-0.03017	0.01273	-0.01543	0.02158	-0.02122
5.61178	0.0137	-0.03131	0.02271	-0.0389	0.01265	-0.01765	0.02154	-0.02404
5.62878	0.01252	-0.02765	0.03251	-0.03583	0.01272	-0.0156	0.02069	-0.02148
5.64678	0.01228	-0.02133	0.03419	-0.02161	0.01264	-0.01387	0.01998	-0.01937
5.66378	0.01149	-0.0257	0.02559	-0.04047	0.01713	-0.01565	0.02397	-0.02139
5.68078	0.01156	-0.04874	0.02288	-0.03565	0.01346	-0.01259	0.02105	-0.02032
5.69878	0.01534	-0.04546	0.03199	-0.03472	0.01331	-0.01134	0.02018	-0.0192
5.71578	0.02612	-0.03681	0.04745	-0.02729	0.01007	-0.00986	0.01613	-0.01607
5.73378	0.02114	-0.04485	0.03031	-0.03724	0.00958	-0.0098	0.01526	-0.01398
5.75078	0.0233	-0.03595	0.02844	-0.02903	0.00951	-0.01064	0.01468	-0.01261
5.76778	0.02341	-0.02234	0.02503	-0.0196	0.01084	-0.01166	0.01912	-0.01385
5.78578	0.02291	-0.03638	0.02293	-0.02275	0.01047	-0.01163	0.01642	-0.01384
5.80278	0.02381	-0.04403	0.03538	-0.02526	0.01035	-0.01413	0.01581	-0.01464
5.82078	0.02233	-0.03413	0.03695	-0.02167	0.00855	-0.01092	0.01255	-0.01388
5.83778	0.01817	-0.03684	0.02929	-0.03478	0.00768	-0.00996	0.0112	-0.01339
5.85478	0.01503	-0.03041	0.02634	-0.02359	0.00805	-0.01023	0.01126	-0.01369
5.87278	0.02025	-0.03439	0.03398	-0.0269	0.01008	-0.01083	0.01271	-0.01372
5.88978	0.01875	-0.04223	0.03066	-0.03049	0.0122	-0.01248	0.01437	-0.01361
5.90778	0.01658	-0.04351	0.02718	-0.0301	0.01022	-0.01581	0.01298	-0.01465
5.92478	0.0245	-0.03812	0.03394	-0.02929	0.00996	-0.01563	0.01335	-0.01485
5.94178	0.01379	-0.03623	0.0188	-0.0267	0.00974	-0.01047	0.01311	-0.01069
5.95978	0.01985	-0.03698	0.02266	-0.02614	0.00858	-0.00985	0.01167	-0.00972
5.97678	0.02024	-0.03969	0.02513	-0.02754	0.0069	-0.00607	0.00914	-0.00741
5.99478	0.02226	-0.03868	0.02985	-0.02836	0.00494	-0.00516	0.00613	-0.00621
6.01178	0.01424	-0.03779	0.02297	-0.02889	0.00399	-0.00366	0.00486	-0.00441
6.02878	0.01368	-0.03028	0.02405	-0.02513	0.00374	-0.00343	0.00448	-0.0042
6.04678	0.01586	-0.02637	0.02834	-0.02307	0.00349	-0.00323	0.0041	-0.00398
6.06378	0.01701	-0.02673	0.02525	-0.02362	0.00332	-0.00298	0.00379	-0.00378
6.08178	0.01538	-0.02393	0.02206	-0.02145	0.00321	-0.00274	0.00355	-0.00358
6.09878	0.01307	-0.02372	0.02011	-0.0213	0.00309	-0.0025	0.00335	-0.00339
6.11678	0.01086	-0.02335	0.01665	-0.02089	0.00303	-0.00237	0.00321	-0.00324
6.13378	0.01027	-0.02318	0.0144	-0.01964	0.00305	-0.00228	0.00323	-0.00307
6.15078	0.01045	-0.02168	0.01409	-0.01745	0.00307	-0.0022	0.0033	-0.00295
6.16878	0.01084	-0.02036	0.01419	-0.01588	0.00307	-0.00211	0.00331	-0.00282
6.18578	0.0107	-0.01673	0.01199	-0.01265	0.00306	-0.00202	0.00334	-0.00268
6.20378	0.01003	-0.01546	0.01109	-0.01135	0.00305	-0.00193	0.00336	-0.00253
6.22078	0.00893	-0.01465	0.00979	-0.01044	0.00306	-0.00183	0.0034	-0.00238
6.23778	0.00828	-0.01384	0.00892	-0.00954	0.00306	-0.00175	0.00342	-0.00222
6.25578	0.0077	-0.01332	0.00811	-0.00908	0.00306	-0.00165	0.00346	-0.00206
6.27278	0.00721	-0.01306	0.00751	-0.009	0.00306	-0.00159	0.0035	-0.00198
6.29078	0.00675	-0.01286	0.00654	-0.00895	0.00287	-0.00151	0.00327	-0.00188
6.30778	0.0065	-0.01267	0.00593	-0.00888	0.00268	-0.00145	0.00304	-0.00178
6.32478	0.00631	-0.01231	0.00574	-0.00863	0.00247	-0.00138	0.00282	-0.00167
6.34278	0.00618	-0.01146	0.00559	-0.00784	0.00228	-0.00132	0.0026	-0.00157
6.35978	0.00602	-0.01072	0.00544	-0.00722	0.00212	-0.00126	0.00242	-0.00148
6.37778	0.00586	-0.01046	0.00527	-0.00706	0.00197	-0.00118	0.00226	-0.00138
6.39478	0.00567	-0.01026	0.00512	-0.00695	0.00179	-0.00112	0.00201	-0.00127
6.41178	0.00548	-0.00994	0.00494	-0.00679	0.00161	-0.00104	0.00176	-0.00116
6.42978	0.00531	-0.00922	0.00479	-0.00628	0.00146	-0.00096	0.00154	-0.00105
6.44678	0.0057	-0.00842	0.00558	-0.0057	0.00143	-0.00088	0.00141	-0.00095
6.46478	0.00701	-0.00766	0.00825	-0.00516	0.00145	-0.00081	0.00144	-0.00089
6.48178	0.0057	-0.00695	0.00615	-0.00465	0.00148	-0.00076	0.00146	-0.00081
6.49878	0.00371	-0.00653	0.00312	-0.0043	0.00148	-0.00073	0.00148	-0.00079
6.51678	0.00358	-0.0063	0.00302	-0.0041	0.00151	-0.0007	0.0015	-0.00077
6.53378	0.00347	-0.00606	0.00292	-0.0039	0.00153	-0.00068	0.00152	-0.00073
6.55178	0.00334	-0.00582	0.00282	-0.0037	0.00156	-0.00066	0.00153	-0.00071
6.56878	0.00323	-0.00547	0.00271	-0.00339	0.00156	-0.00064	0.00153	-0.0007
6.58578	0.00311	-0.00497	0.00262	-0.0029	0.00132	-0.00062	0.00128	-0.00068
6.60378	0.003	-0.00473	0.00255	-0.00266	0.00104	-0.0006	0.00103	-0.00065
6.62078	0.00291	-0.00401	0.00255	-0.0021	0.0007	-0.00059	0.00072	-0.00064
6.63878	0.00283	-0.00286	0.00258	-0.00132	0.00043	-0.00056	0.00044	-0.00062
6.65578	0.00273	-0.00279	0.00261	-0.00126	0.00039	-0.00053	0.00042	-0.00059
6.67278	0.00264	-0.00273	0.00263	-0.0012	0.00038	-0.00053	0.00039	-0.00059
6.69078	0.00258	-0.00265	0.00262	-0.00116	0.00036	-0.00053	0.00037	-0.0006
6.70778	0.00256	-0.00258	0.00257	-0.0011	0.00032	-0.00054	0.00034	-0.0006
6.72578	0.0025	-0.00235	0.00253	-0.00101	0.00031	-0.00053	0.00031	-0.0006
6.74278	0.00246	-0.00207	0.00248	-0.00093	0.00029	-0.00053	0.00028	-0.00059
6.75978	0.00242	-0.00178	0.00243	-0.00084	0.00025	-0.00053	0.00025	-0.00059
6.77778	0.00238	-0.00152	0.00237	-0.00079	0.00023	-0.00053	0.00023	-0.00057
6.79478	0.00231	-0.0015	0.00232	-0.00077	0.00021	-0.00051	0.0002	-0.00057
6.81278	0.00224	-0.00149	0.00226	-0.00076	0.00019	-0.00051	0.00017	-0.00056
6.82978	0.00216	-0.00168	0.0022	-0.00098	0.00019	-0.0005	0.00017	-0.00055
6.84678	0.00211	-0.00195	0.00214	-0.00124	0.00019	-0.00049	0.00017	-0.00054
6.86478	0.00204	-0.00239	0.00207	-0.00154	0.00018	-0.00048	0.00017	-0.00053
6.88178	0.00197	-0.00263	0.00201	-0.00173	0.00016	-0.00047	0.00017	-0.00052
6.89978	0.0019	-0.00242	0.00195	-0.00159	0.00016	-0.00047	0.00015	-0.00051
6.91678	0.00183	-0.00221	0.00189	-0.00147	0.00015	-0.00046	0.00015	-0.0005
6.93378	0.00175	-0.002	0.00181	-0.00136	0.00014	-0.00045	0.00014	-0.0005
6.95178	0.00166	-0.00182	0.00172	-0.00126	0.00014	-0.00044	0.00014	-0.00048
6.96878	0.00157	-0.00159	0.00164	-0.00112	0.00014	-0.00043	0.00014	-0.00047
6.98678	0.00148	-0.00128	0.00153	-0.00092	0.00014	-0.00042	0.00014	-0.00046
7.00378	0.00136	-0.00098	0.00142	-0.00072	0.00014	-0.00041	0.00014	-0.00045
7.02078	0.00127	-0.0007	0.00133	-0.00052	0.00014	-0.00041	0.00014	-0.00045
7.03878	0.00118	-0.0005	0.00124	-0.00036	0.00014	-0.0004	0.00014	-0.00043
7.05578	0.0011	-0.00046	0.00115	-0.00035	0.00014	-0.00038	0.00014	-0.00042
7.07378	0.00141	-0.00046	0.00134	-0.00034	0.00014	-0.00038	0.00014	-0.00041
7.09078	0.00215	-0.00044	0.00187	-0.00033	0.00014	-0.00037	0.00013	-0.0004
7.10778	0.00172	-0.00041	0.00158	-0.00032	0.00014	-0.00036	0.00013	-0.0004
7.12578	0.00132	-0.0004	0.00131	-0.00029	0.00014	-0.00036	0.00013	-0.00038
7.14278	0.00106	-0.00039	0.00114	-0.00029	0.00014	-0.00034	0.00012	-0.00037
7.16078	0.00099	-0.00035	0.00109	-0.00027	0.00012	-0.00031	0.00012	-0.00035
7.17778	0.00094	-0.00035	0.00105	-0.00027	0.00011	-0.00031	0.00012	-0.00035
7.19478	0.00087	-0.00034	0.001	-0.00025	0.00011	-0.00031	0.00011	-0.00034
7.21278	0.0008	-0.00031	0.00096	-0.00024	0.00011	-0.0003	0.00011	-0.00033
7.22978	0.00074	-0.0003	0.0009	-0.00023	0.0001	-0.00028	0.00011	-0.00031
7.24778	0.00069	-0.00028	0.00086	-0.00021	0.0001	-0.00028	0.0001	-0.0003
7.26478	0.00064	-0.00026	0.00082	-0.00021	0.0001	-0.00026	0.0001	-0.0003
7.28278	0.00058	-0.00023	0.00077	-0.00018	0.0001	-0.00026	0.0001	-0.00028
7.29978	0.00056	-0.00023	0.00074	-0.00018	0.0001	-0.00025	0.0001	-0.00028
7.31678	0.00054	-0.0002	0.00071	-0.00016	0.0001	-0.00024	0.0001	-0.00026
7.33478	0.0005	-0.00019	0.00069	-0.00016	0.0001	-0.00023	9e-05	-0.00025
7.35178	0.00049	-0.00017	0.00065	-0.00014	9e-05	-0.00023	9e-05	-0.00024
7.36978	0.00047	-0.00016	0.00063	-0.00012	9e-05	-0.0002	9e-05	-0.00023
7.38678	0.00044	-0.00013	0.00059	-0.00012	8e-05	-0.0002	9e-05	-0.00022
7.40378	0.00041	-0.00013	0.00057	-0.0001	8e-05	-0.0002	8e-05	-0.0002
7.42178	0.00041	-0.0001	0.00055	-0.0001	8e-05	-0.00018	8e-05	-0.00019
7.43878	0.00041	-0.0001	0.00054	-8e-05	8e-05	-0.00017	8e-05	-0.00018
7.45678	0.0004	-7e-05	0.00053	-6e-05	8e-05	-0.00016	8e-05	-0.00017
7.47378	0.00039	-6e-05	0.00051	-5e-05	8e-05	-0.00015	8e-05	-0.00016
7.49078	0.00038	-5e-05	0.00051	-4e-05	7e-05	-0.00014	7e-05	-0.00014
7.50878	0.00038	-4e-05	0.00049	-2e-05	7e-05	-0.00012	6e-05	-0.00013
7.52578	0.00035	-2e-05	0.00048	-2e-05	6e-05	-0.00011	6e-05	-0.00012
7.54378	0.00033	0	0.00046	0	6e-05	-0.00011	6e-05	-0.00011
7.56078	0.00031	0	0.00045	0	6e-05	-9e-05	5e-05	-0.0001
7.57778	0.00031	0	0.00042	0	6e-05	-8e-05	5e-05	-9e-05
7.59578	0.00029	0	0.0004	0	5e-05	-6e-05	5e-05	-7e-05
7.61278	0.00028	0	0.00038	0	5e-05	-5e-05	5e-05	-5e-05
7.63078	0.00026	0	0.00035	0	5e-05	-5e-05	5e-05	-5e-05
7.64778	0.00024	0	0.00032	0	5e-05	-4e-05	5e-05	-3e-05
7.66478	0.00023	0	0.00031	0	4e-05	-4e-05	4e-05	-3e-05
7.68278	0.00021	0	0.00028	0	3e-05	-4e-05	4e-05	-3e-05
7.69978	0.00019	0	0.00026	0	3e-05	-4e-05	3e-05	-3e-05
7.71778	0.00017	0	0.00023	0	3e-05	-2e-05	3e-05	-2e-05
7.73478	0.00016	0	0.00021	0	3e-05	-1e-05	3e-05	-2e-05
7.75178	0.00013	0	0.00018	0	2e-05	0	2e-05	-2e-05
7.76978	0.00011	0	0.00017	0	2e-05	0	2e-05	0
7.78678	0.00011	0	0.00014	0	1e-05	0	2e-05	0
7.80478	8e-05	0	0.00011	0	1e-05	0	2e-05	0
7.82178	6e-05	0	8e-05	0	0	0	0	0
7.83878	4e-05	0	5e-05	0	0	0	0	0
7.85678	2e-05	0	2e-05	0	0	0	0	0
7.87378	0	0	0	0	0	0	0	0
7.89178	0	0	0	0	0	0	0	0
7.90878	0	0	0	0	0	0	0	0
7.92578	0	0	0	0	0	0	0	0
7.94378	0	0	0	0	0	0	0	0
7.96078	0	0	0	0	0	0	0	0
7.97878	0	0	0	0	0	0	0	0
7.99578	0	0	0	0	0	0	0	0
8.01278	0	0	0	0	0	0	0	0
8.03078	0	0	0	0	0	0	0	0
8.04778	0	0	0	0	0	0	0	0
8.06578	0	0	0	0	0	0	0	0
8.08278	0	0	0	0	0	0	0	0
8.09978	0	0	0	0	0	0	0	0
8.11778	0	0	0	0	0	0	0	0
8.13478	0	0	0	0	0	0	0	0
8.15278	0	0	0	0	0	0	0	0
8.16978	0	0	0	0	0	0	0	0
8.18678	0	0	0	0	0	0	0	0
8.20478	0	0	0	0	0	0	0	0
8.22178	0	0	0	0	0	0	0	0
8.23978	0	0	0	0	0	0	0	0
8.25678	0	0	0	0	0	0	0	0
8.27378	0	0	0	0	0	0	0	0
8.29178	0	0	0	0	0	0	0	0
8.30878	0	0	0	0	0	0	0	0
8.32678	0	0	0	0	0	0	0	0
8.34378	0	0	0	0	0	0	0	0
8.36078	0	0	0	0	0	0	0	0
8.37878	0	0	0	0	0	0	0	0
8.39578	0	0	0	0	0	0	0	0
8.41378	0	0	0	0	0	0	0	0
8.43078	0	0	0	0	0	0	0	0
8.44878	0	0	0	0	0	0	0	0
8.46578	0	0	0	0	0	0	0	0
8.48278	0	0	0	0	0	0	0	0
8.50078	0	0	0	0	0	0	0	0
8.51778	0	0	0	0	0	0	0	0
8.53578	0	0	0	0	0	0	0	0
8.55278	0	0	0	0	0	0	0	0
8.56978	0	0	0	0	0	0	0	0
8.58778	0	0	0	0	0	0	0	0
8.60478	0	0	0	0	0	0	0	0
8.62278	0	0	0	0	0	0	0	0
8.63978	0	0	0	0	0	0	0	0
8.65678	0	0	0	0	0	0	0	0
8.67478	0	0	0	0	0	0	0	0
8.69178	0	0	0	0	0	0	0	0
8.70978	0	0	0	0	0	0	0	0
8.72678	0	0	0	0	0	0	0	0
8.74378	0	0	0	0	0	0	0	0
8.76178	0	0	0	0	0	0	0	0
8.77878	0	0	0	0	0	0	0	0
8.79678	0	0	0	0	0	0	0	0
8.81378	0	0	0	0	0	0	0	0
8.83078	0	0	0	0	0	0	0	0
8.84878	0	0	0	0	0	0	0	0
8.86578	0	0	0	0	0	0	0	0
8.88378	0	0	0	0	0	0	0	0
8.90078	0	0	0	0	0	0	0	0
8.91778	0	0	0	0	0	0	0	0
8.93578	0	0	0	0	0	0	0	0
8.95278	0	0	0	0	0	0	0	0
8.97078	0	0	0	0	0	0	0	0
8.98778	0	0	0	0	0	0	0	0
9.00478	0	0	0	0	0	0	0	0
9.02278	0	0	0	0	0	0	0	0
9.03978	0	0	0	0	0	0	0	0
9.05778	0	0	0	0	0	0	0	0
9.07478	0	0	0	0	0	0	0	0
9.09178	0	0	0	0	0	0	0	0
9.10978	0	0	0	0	0	0	0	0
9.12678	0	0	0	0	0	0	0	0
9.14478	0	0	0	0	0	0	0	0
9.16178	0	0	0	0	0	0	0	0
9.17878	0	0	0	0	0	0	0	0
9.19678	0	0	0	0	0	0	0	0
9.21378	0	0	0	0	0	0	0	0
9.23178	0	0	0	0	0	0	0	0
9.24878	0	0	0	0	0	0	0	0
9.26578	0	0	0	0	0	0	0	0
9.28378	0	0	0	0	0	0	0	0
9.30078	0	0	0	0	0	0	0	0
9.31878	0	0	0	0	0	0	0	0
9.33578	0	0	0	0	0	0	0	0
9.35278	0	0	0	0	0	0	0	0
9.37078	0	0	0	0	0	0	0	0
9.38778	0	0	0	0	0	0	0	0
9.40578	0	0	0	0	0	0	0	0
9.42278	0	0	0	0	0	0	0	0
9.43978	0	0	0	0	0	0	0	0
[truncated: 1 more rows]

## Sheet: Figure3 c
Energy	−COHP
-16.0308	0	0
-15.9807	0	0
-15.9306	0	0
-15.8805	0	0
-15.8304	0	0
-15.7804	0	0
-15.7302	0	0
-15.6801	0	0
-15.6301	0	0
-15.58	0	0
-15.5299	0	0
-15.4798	0	0
-15.4297	0	0
-15.3796	0	0
-15.3295	0	0
-15.2794	0	0
-15.2293	0	0
-15.1792	0	0
-15.1291	0	0
-15.079	0	0
-15.0289	0	0
-14.9788	0	0
-14.9287	0	0
-14.8786	0	0
-14.8285	0	0
-14.7784	0	0
-14.7283	0	0
-14.6782	0	0
-14.6281	0	0
-14.578	0	0
-14.5279	0	0
-14.4778	0	0
-14.4277	0	0
-14.3776	0	0
-14.3276	0	0
-14.2775	0	0
-14.2274	0	0
-14.1773	0	0
-14.1272	0	0
-14.0771	0	0
-14.027	0	0
-13.9769	0	0
-13.9268	0	0
-13.8767	0	0
-13.8266	0	0
-13.7765	0	0
-13.7264	0	0
-13.6763	0	0
-13.6262	0	0
-13.5761	0	0
-13.526	0	0
-13.4759	0	0
-13.4258	0	0
-13.3757	0	0
-13.3256	0	0
-13.2755	0	0
-13.2254	0	0
-13.1753	0	0
-13.1252	0	0
-13.0751	0	0
-13.0251	0	0
-12.9749	0	0
-12.9249	0	0
-12.8748	0	0
-12.8247	0	0
-12.7746	0	0
-12.7245	0	0
-12.6744	0	0
-12.6243	0	0
-12.5742	0	0
-12.5241	0	0
-12.474	0	0
-12.4239	0	0
-12.3738	0	0
-12.3237	0	0
-12.2736	0	0
-12.2235	0	0
-12.1734	0	0
-12.1233	0	0
-12.0732	0	0
-12.0231	0	0
-11.973	0	0
-11.9229	0	0
-11.8728	0	0
-11.8227	0	0
-11.7726	0	0
-11.7225	0	0
-11.6724	0	0
-11.6224	0	0
-11.5723	0	0
-11.5222	0	0
-11.4721	0	0
-11.422	0	0
-11.3719	0	0
-11.3218	0	0
-11.2717	0	0
-11.2216	0	0
-11.1715	0	0
-11.1214	0	0
-11.0713	0	0
-11.0212	0	0
-10.9711	0	0
-10.921	0	0
-10.8709	0	11.9489
-10.8208	0	0
-10.7707	0	0
-10.7206	0	0
-10.6705	0	0
-10.6204	0	0
-10.5703	11.3375	0
-10.5202	0	0
-10.4701	0	0
-10.42	0	0
-10.3699	0	0
-10.3199	0	0
-10.2698	0	0
-10.2196	0	0
-10.1696	0	0
-10.1195	0	0
-10.0694	0	0
-10.0193	0	0
-9.96917	0	0
-9.91908	0	0
-9.86898	0	0
-9.81888	0	0
-9.76879	0	0
-9.71869	0	0
-9.66859	0	0
-9.6185	0	0
-9.5684	0	0
-9.5183	0	0
-9.46821	0	0
-9.41811	0	0
-9.36802	0	0
-9.31792	0	0
-9.26782	0	0
-9.21773	0	0
-9.16763	0	0
-9.11753	0	0
-9.06744	0	0
-9.01734	0	0
-8.96724	0	0
-8.91715	0	0
-8.86705	0	0
-8.81696	0	0
-8.76686	0	0
-8.71676	0	0
-8.66667	0	0
-8.61657	0	0
-8.56647	0	0
-8.51638	0	0
-8.46628	0	0
-8.41618	2e-05	0.00124
-8.36609	0.00379	0.00539
-8.31599	0.00486	0.00489
-8.2659	0.00451	0.00535
-8.2158	0.00338	0.00525
-8.1657	0.00077	0.0065
-8.11561	-0.00068	0.00879
-8.06551	-0.00218	0.03105
-8.01541	-0.00166	0.11102
-7.96532	0.00057	0.2957
-7.91522	0.00186	0.59408
-7.86513	0.00324	1.16166
-7.81503	0.00388	1.45559
-7.76493	0.0028	4.77619
-7.71484	0.00275	69.2417
-7.66474	0.00278	5.01287
-7.61464	0.00483	1.63671
-7.56455	0.034	1.28595
-7.51445	0.1022	1.01581
-7.46435	0.17773	0.72272
-7.41426	0.37458	0.02985
-7.36416	0.81708	-0.18352
-7.31407	1.57813	-0.3471
-7.26397	2.58703	-0.59921
-7.21387	4.22726	-0.94412
-7.16378	7.08278	-1.69528
-7.11368	55.0658	-2.19472
-7.06358	4.93039	-1.19345
-7.01349	3.15865	-0.69671
-6.96339	1.87832	-0.49301
-6.91329	1.18534	-0.37814
-6.8632	0.66577	-0.27541
-6.8131	0.3106	-0.15851
-6.76301	0.12099	-0.09412
-6.71291	-0.06504	-0.05477
-6.66281	-0.58598	-0.06501
-6.61272	-1.95691	-0.09153
-6.56262	-2.56911	-0.07002
-6.51252	-1.3425	-0.05388
-6.46243	-0.79401	-0.04469
-6.41233	-0.45795	-0.035
-6.36224	-0.34075	-0.03559
-6.31214	-0.26515	-0.03845
-6.26204	-0.28614	-0.03914
-6.21195	-0.29506	-0.03646
-6.16185	-0.19879	-0.02441
-6.11175	-0.10076	-0.02073
-6.06166	-0.07398	-0.02681
-6.01156	-0.06954	-0.02495
-5.96146	-0.066	-0.02201
-5.91137	-0.05133	-0.01027
-5.86127	-0.01529	-0.01416
-5.81118	-0.02715	-0.02012
-5.76108	-0.0357	-0.01032
-5.71098	-0.01663	-0.0128
-5.66089	-0.01968	-0.01283
-5.61079	-0.01713	-0.01307
-5.56069	-0.01767	-0.01042
-5.5106	-0.0123	-0.00681
-5.4605	-0.00836	-0.00682
-5.4104	-0.00266	-0.01263
-5.36031	-0.01676	-0.00843
-5.31021	-0.0127	-0.01248
-5.26012	-0.00416	-0.02486
-5.21002	-0.01338	-0.07075
-5.15992	-0.02239	-0.04055
-5.10983	-0.06821	-0.12664
-5.05973	-0.1113	-0.10424
-5.00963	-0.13398	-0.17182
-4.95954	-0.18714	-0.07168
-4.90944	-0.05385	-0.03169
-4.85934	-0.11318	-0.06977
-4.80925	-0.03364	-0.16486
-4.75915	-0.31722	-0.17351
-4.70906	-0.06428	-0.1394
-4.65896	-0.1855	-0.1349
-4.60886	-0.13031	-0.09796
-4.55877	-0.09362	-0.08414
-4.50867	-0.06573	-0.04352
-4.45857	-0.08897	-0.01636
-4.40848	-0.02951	-0.01441
-4.35838	-0.05152	-0.00612
-4.30829	-0.03168	-0.00505
-4.25819	-0.04187	-0.07757
-4.20809	-0.05937	-0.14445
-4.158	-0.03155	-0.1398
-4.1079	-0.18598	-0.07758
-4.0578	-0.03074	-0.04128
-4.00771	-0.05618	-0.04861
-3.95761	-0.03461	-0.05745
-3.90751	-0.03227	-0.02831
-3.85742	-0.02422	-0.02876
-3.80732	-0.02402	-0.07517
-3.75723	-0.04284	-0.17787
-3.70713	-0.03094	-0.05064
-3.65703	-0.06686	-0.14556
-3.60694	-0.30587	-0.62592
-3.55684	-0.44855	-0.20052
-3.50674	-0.08346	-0.07396
-3.45665	-0.06079	-0.13585
-3.40655	-0.15504	-0.47788
-3.35645	-0.37189	-0.13499
-3.30636	-0.11546	-0.09501
-3.25626	-0.03092	-0.05804
-3.20617	-0.04686	-0.11225
-3.15607	-0.05308	-0.0775
-3.10597	-0.02993	-0.09937
-3.05588	-0.08694	-0.2825
-3.00578	-0.36813	-0.66844
-2.95568	-0.48642	-0.32663
-2.90559	-0.07268	-0.09976
-2.85549	-0.10294	-0.09283
-2.80539	-0.06449	-0.06608
-2.7553	-0.05464	-0.15788
-2.7052	-0.26009	-0.43461
-2.65511	-0.28666	-0.16728
-2.60501	-0.26039	-0.3534
-2.55491	-0.35378	-0.39194
-2.50482	-0.2588	-0.16274
-2.45472	-0.26961	-0.25292
-2.40462	-0.13036	-0.22887
-2.35453	-0.08553	-0.08872
-2.30443	-0.05843	-0.07057
-2.25434	-0.03155	-0.04006
-2.20424	-0.03569	-0.03015
-2.15414	-0.01545	-0.03437
-2.10405	-0.01422	-0.04679
-2.05395	-0.04662	-0.04097
-2.00385	-0.02397	-0.03062
-1.95376	-0.01649	-0.02331
-1.90366	-0.02127	-0.03515
-1.85356	-0.01626	-0.01978
-1.80347	-0.01818	-0.03717
-1.75337	-0.01893	-0.03987
-1.70328	-0.0299	-0.05275
-1.65318	-0.05466	-0.0702
-1.60308	-0.07536	-0.08159
-1.55299	-0.06387	-0.06497
-1.50289	-0.08929	-0.07796
-1.45279	-0.19091	-0.05519
-1.4027	-0.35668	-0.04219
-1.3526	-0.57685	-0.06849
-1.3025	-0.74403	-0.0667
-1.25241	-1.43697	-0.06451
-1.20231	-0.86785	-0.06286
-1.15222	-0.63816	-0.12577
-1.10212	-0.53132	-0.11606
-1.05202	-0.35842	-0.07924
-1.00193	-0.21874	-0.07479
-0.95183	-0.17331	-0.06662
-0.90173	-0.13636	-0.06697
-0.85164	-0.09654	-0.06724
-0.80154	-0.14651	-0.07585
-0.75145	-0.13216	-0.12549
-0.70135	-0.09907	-0.07874
-0.65125	-0.06449	-0.08021
-0.60116	-0.07422	-0.0941
-0.55106	-0.1746	-0.13174
-0.50096	-0.23552	-0.15838
-0.45087	-0.15005	-0.21817
-0.40077	-0.1021	-0.1812
-0.35067	-0.07662	-0.25941
-0.30058	-0.13208	-0.58594
-0.25048	-0.12435	-0.37369
-0.20039	-0.36328	-0.26186
-0.15029	-0.31287	-0.28281
-0.10019	-0.41591	-0.36111
-0.0501	-0.51986	-0.26679
0	-0.45083	-0.24363
0.0501	-0.27368	-0.36683
0.10019	-0.22728	-0.46648
0.15029	-0.41121	-0.57476
0.20039	-0.44708	-0.6276
0.25048	-0.49073	-0.90495
0.30058	-1.09289	-1.80885
0.35067	-3.00747	-3.7398
0.40077	-1.81554	-5.31671
0.45087	-3.29032	-3.18345
0.50096	-5.35455	-3.11907
0.55106	-4.00937	-2.8744
0.60116	-2.44265	-2.41615
0.65125	-1.31802	-2.36966
0.70135	-1.30563	-2.24294
0.75145	-2.18643	-4.48048
0.80154	-1.8126	-1.09412
0.85164	-1.59508	-0.94572
0.90173	-0.33723	-2.09339
0.95183	-0.33413	-2.93134
1.00193	-0.63707	-1.85093
1.05202	-0.80173	-2.3005
1.10212	-1.21867	-2.85227
1.15222	-1.29347	-2.85201
1.20231	-1.52826	-3.90349
1.25241	-1.60303	-4.06523
1.3025	-1.73685	-5.19171
1.3526	-1.63705	-2.57383
1.4027	-1.24767	-2.20608
1.45279	-1.48119	-2.35413
1.50289	-2.47309	-7.84197
1.55299	-3.77903	-8.78935
1.60308	-2.00437	-4.9994
1.65318	-2.28807	-4.86294
1.70328	-1.99109	-4.32786
1.75337	-2.17068	-3.83401
1.80347	-2.09211	-7.6779
1.85356	-2.15284	-4.26614
1.90366	-3.15346	-3.14962
1.95376	-3.12511	-2.5775
2.00385	-4.43608	-2.54569
2.05395	-4.54011	-3.35235
2.10405	-6.65277	-3.95805
2.15414	-6.08562	-3.66255
2.20424	-5.89615	-3.11312
2.25434	-5.45211	-3.20422
2.30443	-5.67499	-3.21545
2.35453	-6.12427	-2.86122
2.40462	-3.51962	-3.54554
2.45472	-3.23418	-4.67423
2.50482	-4.28387	-2.94763
2.55491	-6.29617	-2.12809
2.60501	-6.84651	-1.40404
2.65511	-4.90233	-1.21394
2.7052	-2.91814	-1.65549
2.7553	-3.03552	-1.73345
2.80539	-3.29308	-1.48205
2.85549	-2.77918	-0.82052
2.90559	-2.47409	-0.73941
2.95568	-2.5387	-0.79582
3.00578	-2.57629	-1.76355
3.05588	-2.66939	-2.84029
3.10597	-2.93647	-2.44109
3.15607	-1.93669	-2.21089
3.20617	-1.90797	-2.43423
3.25626	-1.79272	-1.97247
3.30636	-2.01434	-1.46179
3.35645	-2.07976	-1.05004
3.40655	-1.30881	-0.91861
3.45665	-0.8411	-1.70314
3.50674	-1.42265	-1.69376
3.55684	-1.16851	-1.75812
3.60694	-1.24137	-1.50664
3.65703	-1.02575	-0.88678
3.70713	-0.79206	-0.52553
3.75723	-0.37515	-0.28121
3.80732	-0.11074	-0.21021
3.85742	-0.10671	-0.09855
3.90751	-0.0625	-0.01436
3.95761	-0.02528	0
4.00771	-0.00133	0
4.0578	0	0
4.1079	0	0
4.158	0	0
4.20809	0	0
4.25819	0	0
4.30829	0	0
4.35838	0	0
4.40848	0	0
4.45857	0	0
4.50867	0	0
4.55877	0	0
4.60886	0	0
4.65896	0	0
4.70906	0	0
4.75915	0	0
4.80925	0	0
4.85934	0	0
4.90944	0	0
4.95954	0	0
5.00963	0	0
5.05973	0	0
5.10983	0	0
5.15992	0	0
5.21002	0	0
5.26012	0	0
5.31021	0	0
5.36031	0	0
5.4104	0	0
5.4605	0	0
5.5106	0	0
5.56069	0	0
5.61079	0	0
5.66089	0	0
5.71098	0	0
5.76108	0	0
5.81118	0	0
5.86127	0	0
5.91137	0	0
5.96146	0	0
6.01156	0	0
6.06166	0	0
6.11175	0	0
6.16185	0	0
6.21195	0	0
6.26204	0	0
6.31214	0	0
6.36224	0	0
6.41233	0	0
6.46243	0	0
6.51252	0	0
6.56262	0	0
6.61272	0	0
6.66281	0	0
6.71291	0	0
6.76301	0	0
6.8131	0	0
6.8632	0	0
6.91329	0	0
6.96339	0	0
7.01349	0	0
7.06358	0	0
7.11368	0	0
7.16378	0	0
7.21387	0	0
7.26397	0	0
7.31407	0	0
7.36416	0	0
7.41426	0	0
7.46435	0	0
7.51445	0	0
7.56455	0	0
7.61464	0	0
7.66474	0	0
7.71484	0	0
7.76493	0	0
7.81503	0	0
7.86513	0	0
7.91522	0	0
7.96532	0	0
8.01541	0	0
8.06551	0	0
8.11561	0	0
8.1657	0	0
8.2158	0	0
8.2659	0	0
8.31599	0	0
8.36609	0	0
8.41618	0	0
8.46628	0	0
8.51638	0	0
8.56647	0	0
8.61657	0	0
8.66667	0	0
8.71676	0	0
8.76686	0	0
8.81696	0	0
8.86705	0	0
8.91715	0	0
8.96724	0	0
9.01734	0	0
9.06744	0	0
9.11753	0	0
9.16763	0	0
9.21773	0	0
9.26782	0	0
9.31792	0	0
9.36802	0	0
9.41811	0	0
9.46821	0	0
9.5183	0	0
9.5684	0	0
9.6185	0	0
9.66859	0	0
9.71869	0	0
9.76879	0	0
9.81888	0	0
9.86898	0	0
9.91908	0	0
9.96917	0	0
10.0193	0	0

## Sheet: Figure5 a
N≡N	ΔG
1.118	0.38988	1.17824	-1.32721
1.135	-1.43606	1.20604	-2.11339
1.128	-0.21764	2.80793	-0.16391
1.12	-0.05266	1.56144	-0.8627
1.136	-1.0381	1.48392	-1.81868
1.134	-2.378	1.76148	-2.85903
1.14	-0.85154	1.51345	-2.41841
1.126	-0.07096	1.82357	-0.43925
1.119	-0.0139	1.40415	-0.72929
1.118	0.04527	1.39815	-0.06886
1.15	-0.46357	0.46571	0.08312
1.156	-0.97896	0.40319	-0.10826
1.155	-1.30794	0.51886	-0.24139
1.15	-1.36778	0.86011	-0.58995
1.143	-0.97362	1.3805	-0.54563
1.131	-0.30163	1.57273	-0.48603
1.118	-0.01864	2.10168	-0.51931
1.118	0.00737	1.99253	-0.51071
1.118	0.0087	2.18623	0.41111
1.118	0.05398	1.11088	0.02331
1.156	-0.63602	0.34912	0.30101
1.159	-1.38376	0.25128	0.17534
1.158	-1.57101	0.43203	-0.02887
1.154	-1.53023	0.71253	-0.36317
1.147	-1.09293	1.25108	-0.68148
1.136	-0.30944	1.3917	-0.51769
1.119	-0.00381	2.05539	-0.58227
1.119	-0.08256	2.16651	-0.44308

## Sheet: Figure5 b
δ(N2)	ΔG
0.00691	0.38988	1.17824	-1.32721
0.31403	-1.43606	1.20604	-2.11339
0.18023	-0.21764	2.80793	-0.16391
0.09338	-0.05266	1.56144	-0.8627
0.32755	-1.0381	1.48392	-1.81868
0.31493	-2.378	1.76148	-2.85903
0.41012	-0.85154	1.51345	-2.41841
0.15771	-0.07096	1.82357	-0.43925
0.0625	-0.0139	1.40415	-0.72929
0.00752	0.04527	1.39815	-0.06886
0.50175	-0.46357	0.46571	0.08312
0.63672	-0.97896	0.40319	-0.10826
0.62502	-1.30794	0.51886	-0.24139
0.51795	-1.36778	0.86011	-0.58995
0.43604	-0.97362	1.3805	-0.54563
0.26533	-0.30163	1.57273	-0.48603
0.03433	-0.01864	2.10168	-0.51931
0.04259	0.00737	1.99253	-0.51071
0.00569	0.0087	2.18623	0.41111
0.0098	0.05398	1.11088	0.02331
0.55833	-0.63602	0.34912	0.30101
0.77093	-1.38376	0.25128	0.17534
0.76385	-1.57101	0.43203	-0.02887
0.63592	-1.53023	0.71253	-0.36317
0.50732	-1.09293	1.25108	-0.68148
0.36016	-0.30944	1.3917	-0.51769
0.05682	-0.00381	2.05539	-0.58227
0.05588	-0.08256	2.16651	-0.44308

## Sheet: Figure6 a
Reaction coordinates	Free Energy
4	0
6	0
9	-1.38376		-0.99559
11	-1.38376		-0.99559
14	-1.13248		-0.8153
16	-1.13248		-0.8153
19	-1.49843	-0.24948	-1.00689	-0.81192
21	-1.49843	-0.24948	-1.00689	-0.81192
24	-2.38142	-0.8879		-1.12865
26	-2.38142	-0.8879		-1.12865
29	-2.80346	-0.55961		-0.79052
31	-2.80346	-0.55961		-0.79052
34	-2.53832
36	-2.53832
39	-2.36298
41	-2.36298
44	-1.2
46	-1.2

## Sheet: Figure6 b
Reaction coordinates	Free Energy
4			0
6			0
9	-0.07096		-0.166
11	-0.07096		-0.166
14	1.75261		1.48501
16	1.75261		1.48501
19	1.25982	1.29195	1.34385	1.16441
21	1.25982	1.29195	1.34385	1.16441
24		0.79805	0.2518	0.51736
26		0.79805	0.2518	0.51736
29		0.42634	-0.55545	0.42956
31		0.42634	-0.55545	0.42956
34			-1.03926
36			-1.03926
39			-1.47851
41			-1.47851
44			-1.2
46			-1.2

## Sheet: Figure6 c
TM/Cu SAAs	Limiting Potential
					-0.98
Ti		-1.08			-0.98
V		-0.03			-0.98
Cr	-2.81				-0.98
Mn	-1.56				-0.98
Fe		-1.25			-0.98
Co		-1.42			-0.98
Ni	-1.51				-0.98
Cu		-1.66			-0.98
Zn	-1.4				-0.98
Zr		-1.05			-0.98
Nb		-0.1			-0.98
Mo		-0.3			-0.98
Tc		-0.45			-0.98
Ru	-0.86				-0.98
Rh		-0.7			-0.98
Pd	-1.57				-0.98
Ag	-2.1				-0.98
Cd		-1.72			-0.98
Lu	-2.18				-0.98
Hf		-0.84			-0.98
Ta				-0.3	-0.98
W			-0.26		-0.98
Re	-0.43				-0.98
Os	-0.71				-0.98
Ir		-0.42			-0.98
Pt		-1.21			-0.98
Au	-2.05				-0.98
Hg	-2.16				-0.98
					-0.98

[truncated: 5 more sheets: Figure6 d, Figure7 a, Figure7 b, Figure7 d, Figure7 f]
